# Supplementary material
Source: publisher figshare collection journal article supplement (https://geolsoc.figshare.com/ndownloader/files/24117888)

## Supplementary material

Fig. S1. Stereographic projection of fractures.

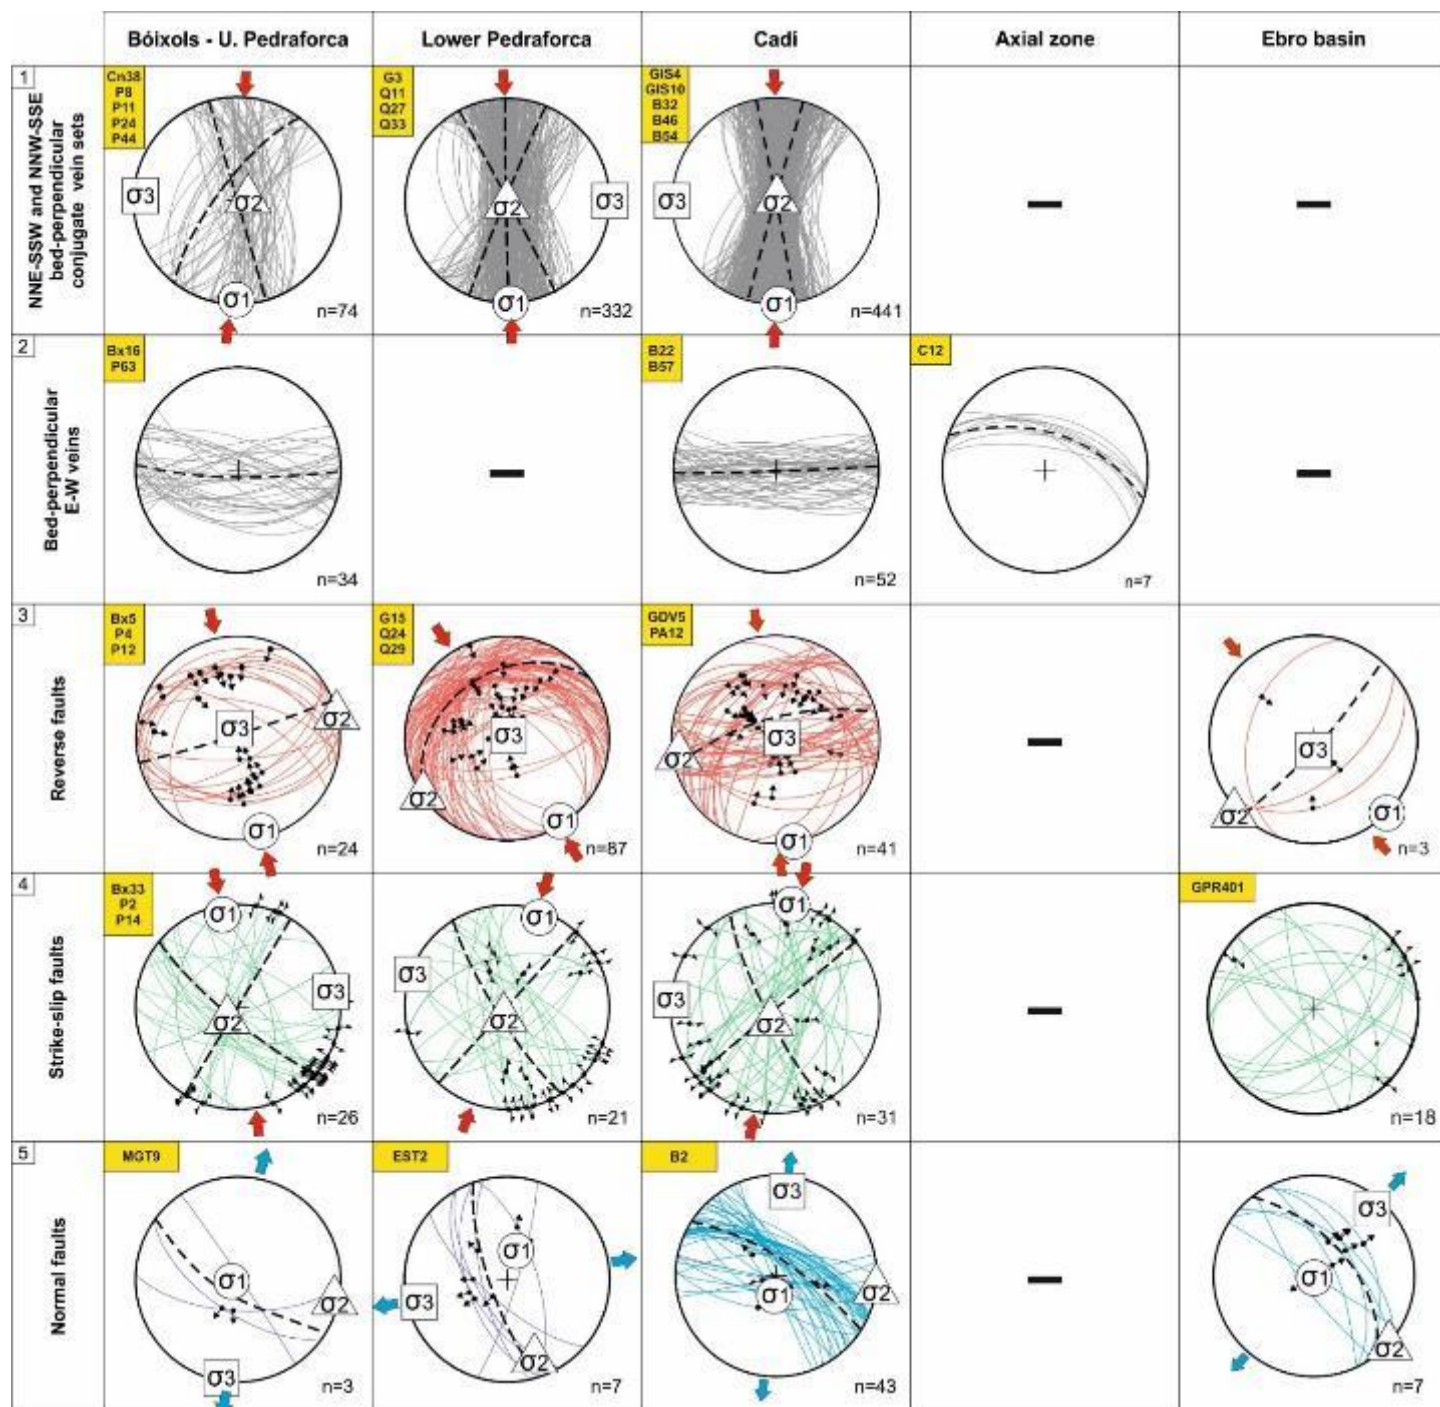

**Table S1. Description and field images of samples**

**Bóixols – Upper Pedraforca thrust sheet**

| Sample | Location                      | Description                   | Host rock                   | Age |
|--------|-------------------------------|-------------------------------|-----------------------------|-----|
| Bx1a   | 42° 9'55.90"N<br>1° 9'38.96"E | E-W sub-vertical calcite vein | Upper Cretaceous limestones | No  |

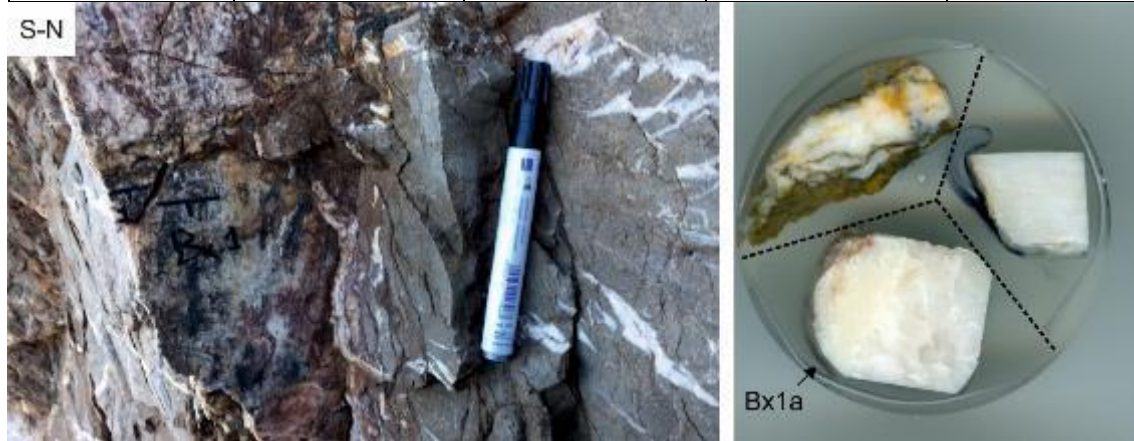

| Sample | Location                      | Description                  | Host rock                   | Age |
|--------|-------------------------------|------------------------------|-----------------------------|-----|
| Bx5    | 42° 9'56.73"N<br>1° 9'39.25"E | Calcite within reverse fault | Upper Cretaceous limestones | Yes |

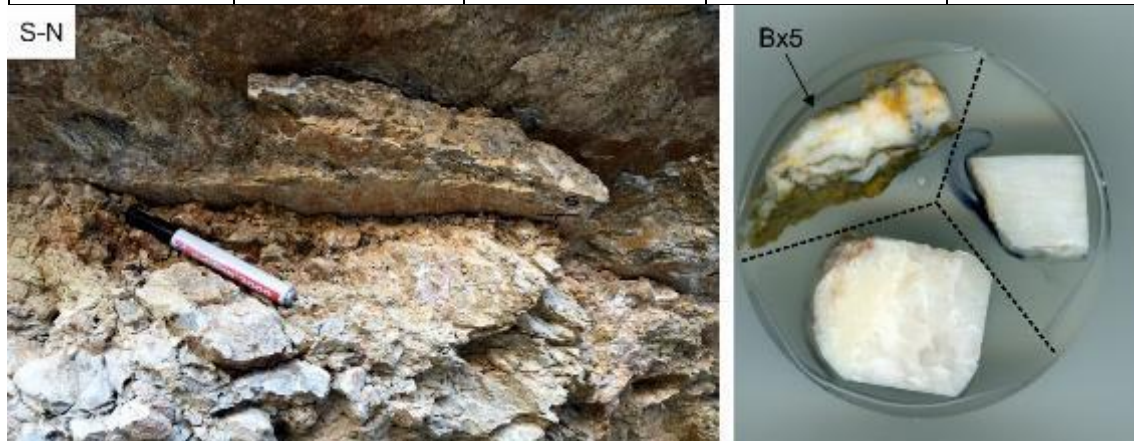

| Sample | Location                     | Description                 | Host rock           | Age |
|--------|------------------------------|-----------------------------|---------------------|-----|
| Bx10   | 42°10'9.17"N<br>1° 9'47.38"E | Calcite within normal fault | Jurassic limestones | No  |

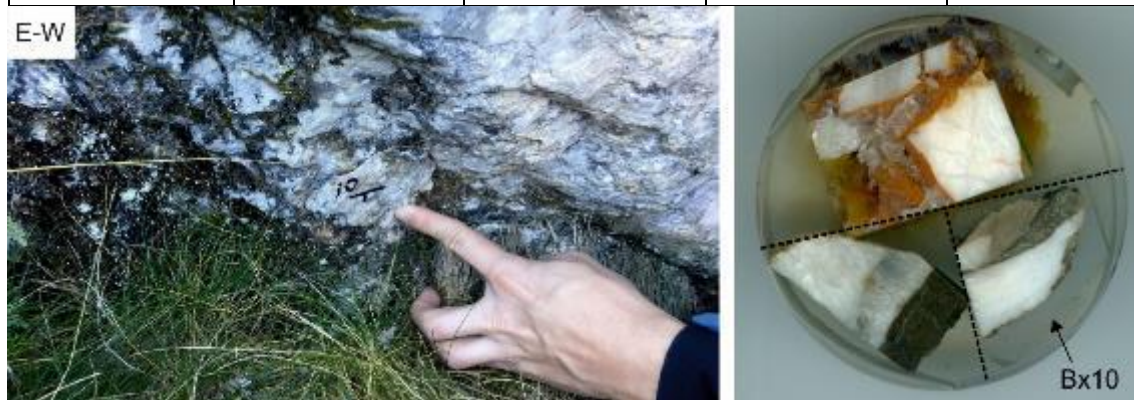

| Sample | Location | Description | Host rock | Age |
|--------|----------|-------------|-----------|-----|
|--------|----------|-------------|-----------|-----|

|      |                               |                   |                                   |     |
|------|-------------------------------|-------------------|-----------------------------------|-----|
| Bx16 | 42°10'24.90"N<br>1° 9'55.47"E | E-W calcite veins | Lower<br>Cretaceous<br>limestones | Yes |
|------|-------------------------------|-------------------|-----------------------------------|-----|

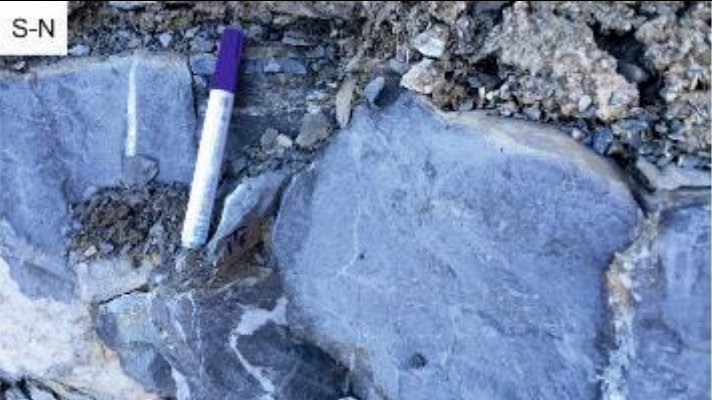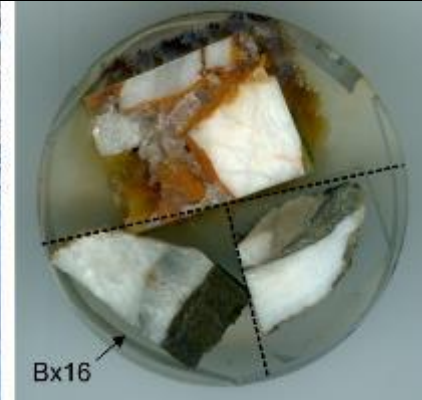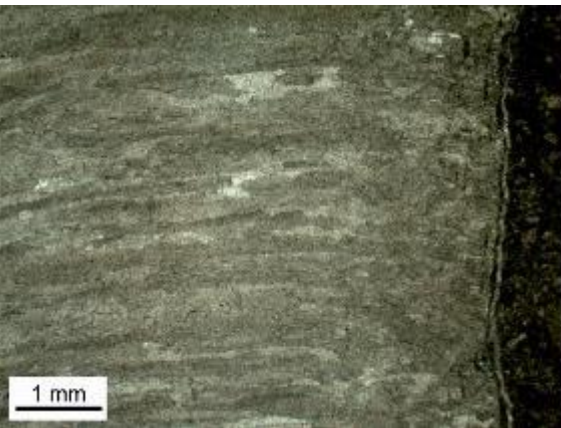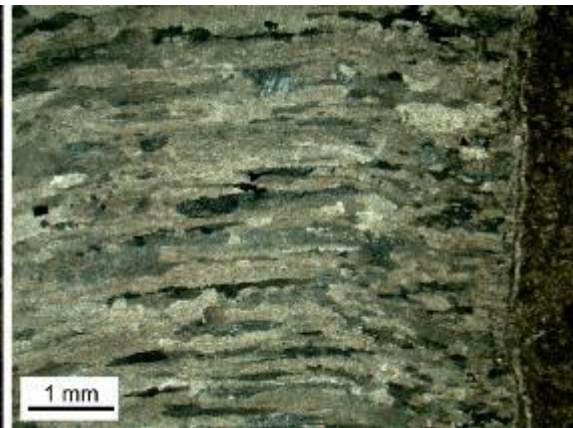

Sample Bx16: Optical microscope image showing elongated sparite texture perpendicular to fracture walls.

| Sample | Location                      | Description                         | Host rock                         | Age |
|--------|-------------------------------|-------------------------------------|-----------------------------------|-----|
| Bx11   | 42°10'25.48"N<br>1° 9'55.30"E | Calcite within<br>strike-slip fault | Lower<br>Cretaceous<br>limestones | No  |

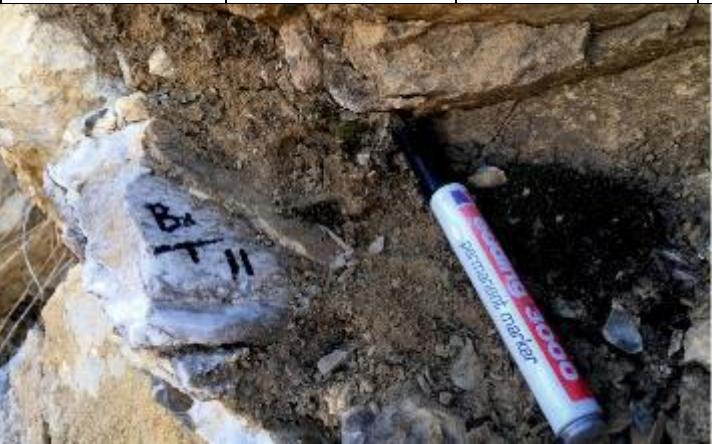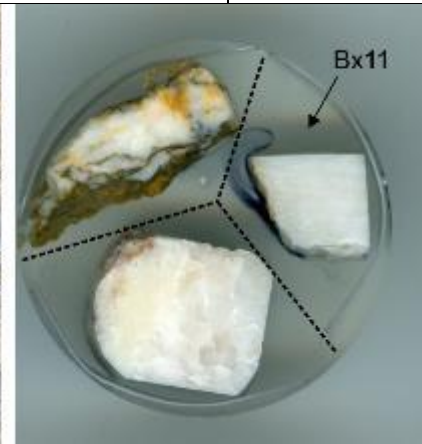

| Sample | Location                      | Description                         | Host rock                                   | Age |
|--------|-------------------------------|-------------------------------------|---------------------------------------------|-----|
| Bx33   | 42°11'29.08"N<br>0°57'27.28"E | Calcite within<br>strike-slip fault | Upper<br>Cretaceous marls<br>and limestones | Yes |

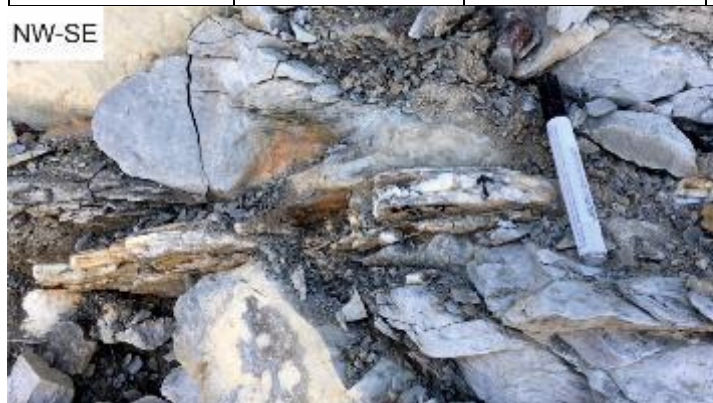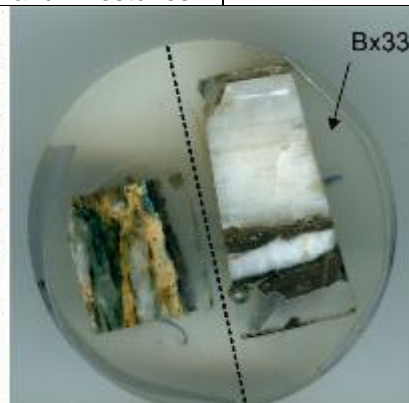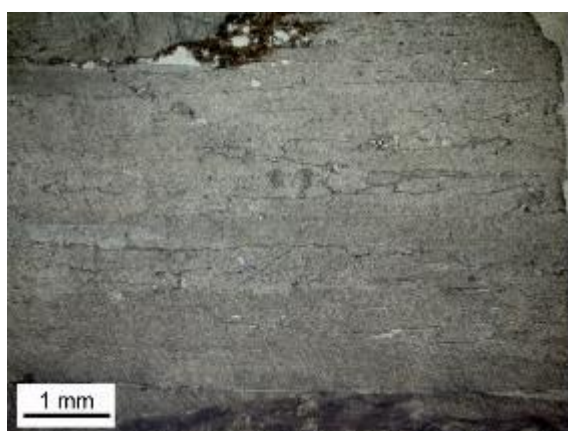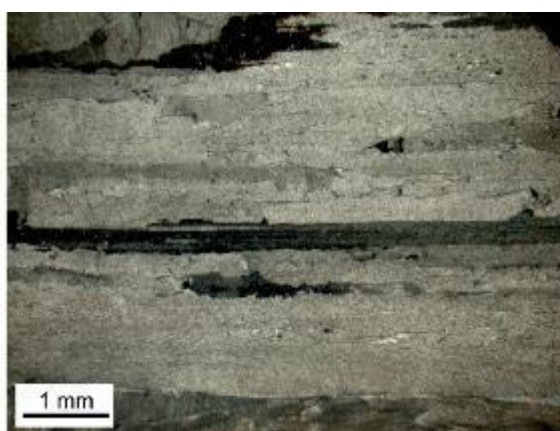

Sample Bx33: Optical microscope image showing elongated sparite texture parallel to fracture walls.

| Sample | Location                      | Description                         | Host rock                         | Age |
|--------|-------------------------------|-------------------------------------|-----------------------------------|-----|
| CN15   | 42°10'36.18"N<br>1°18'24.18"E | Calcite within<br>strike-slip fault | Upper<br>Cretaceous<br>limestones | No  |

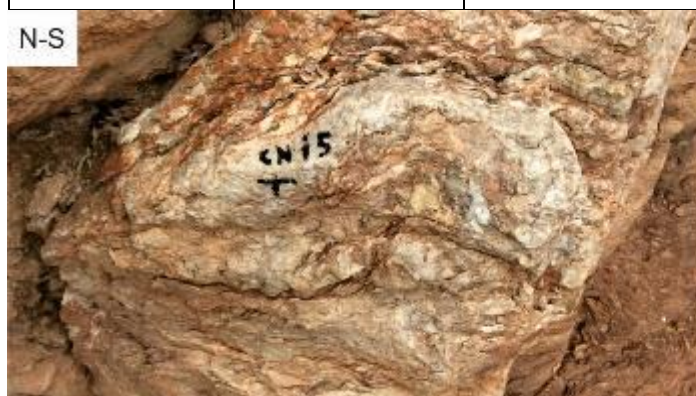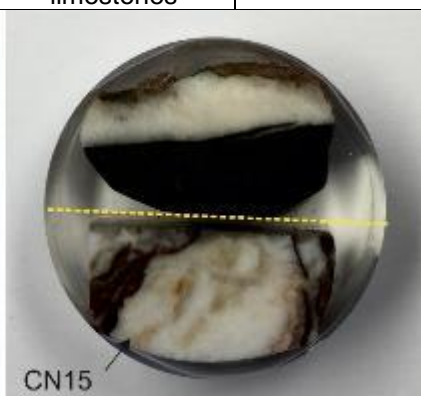

| Sample | Location                      | Description        | Host rock            | Age |
|--------|-------------------------------|--------------------|----------------------|-----|
| CN20   | 42°10'33.65"N<br>1°18'12.63"E | NW-SE calcite vein | Paleocene limestones | No  |

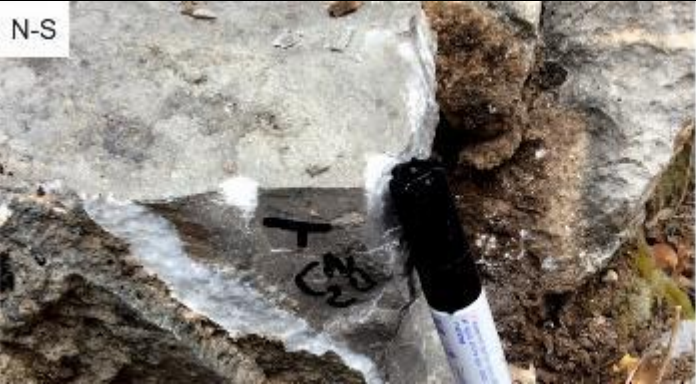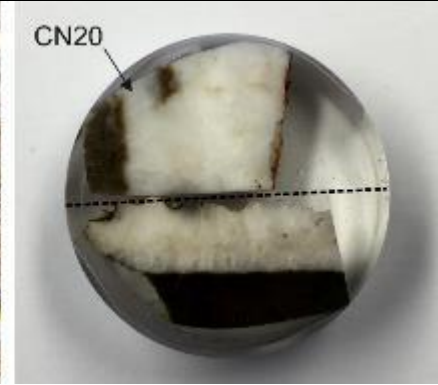

| Sample | Location                     | Description        | Host rock                   | Age |
|--------|------------------------------|--------------------|-----------------------------|-----|
| CN33   | 42°10'39.31"N<br>1°18'59.17" | NE-SW calcite vein | Lower Cretaceous limestones | No  |

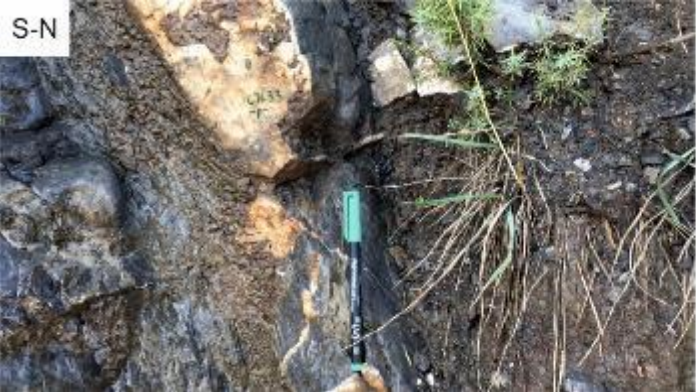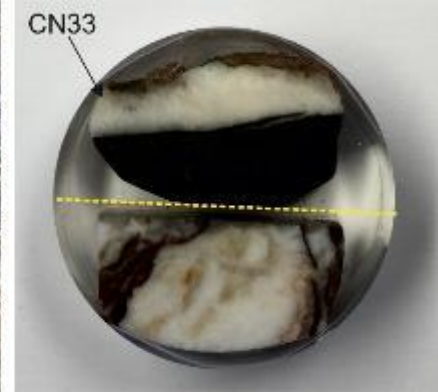

| Sample | Location                     | Description                          | Host rock                 | Age |
|--------|------------------------------|--------------------------------------|---------------------------|-----|
| P69    | 42°14'59.09"N<br>1°39'6.44"E | Calcite within WSW-ENE reverse fault | Lower Cretaceous breccias | No  |

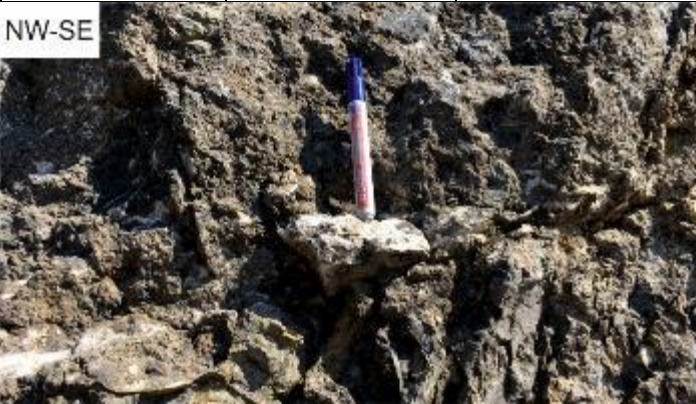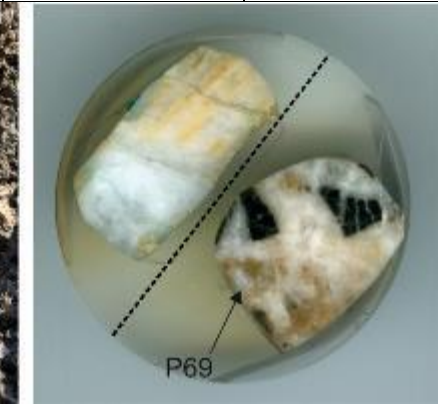

| Sample | Location                      | Description        | Host rock                   | Age |
|--------|-------------------------------|--------------------|-----------------------------|-----|
| CN38   | 42°10'39.52"N<br>1°18'14.41"E | NW-SE calcite vein | Lower Cretaceous limestones | Yes |

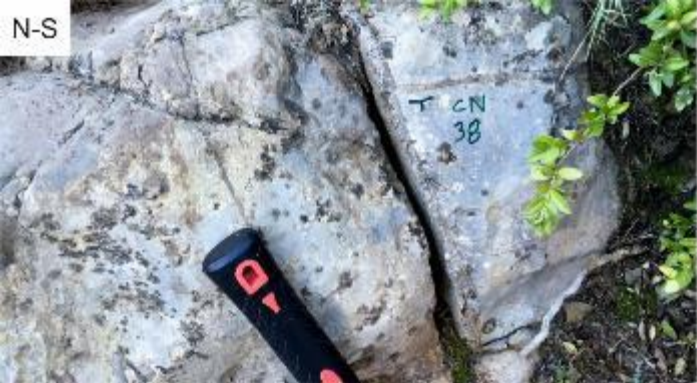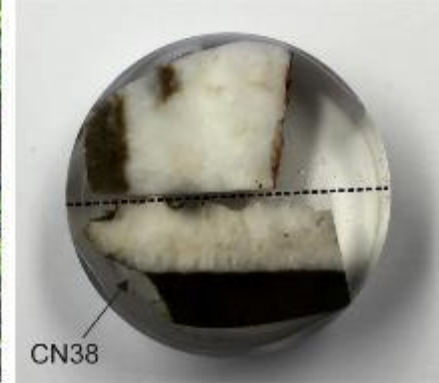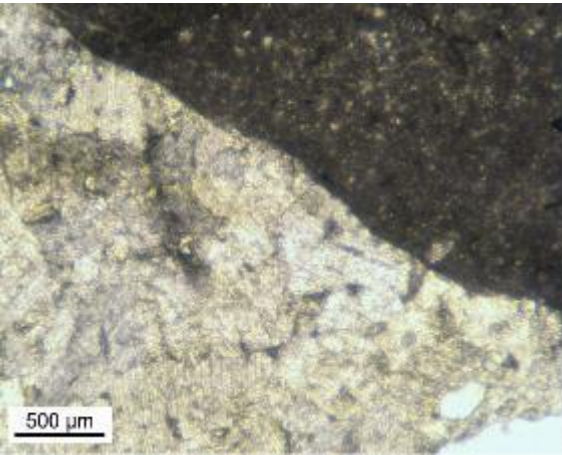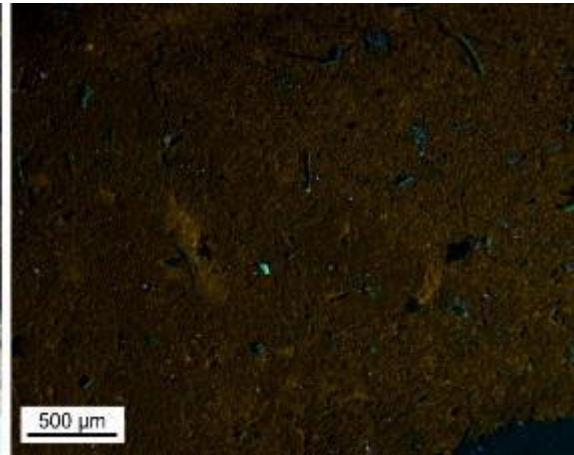

Sample CN38: Optical and cathodoluminescence microscope images showing blocky texture of the aged calcite.

| Sample | Location                      | Description                      | Host rock                 | Age |
|--------|-------------------------------|----------------------------------|---------------------------|-----|
| P86    | 42°14'54.16"N<br>1°38'52.10"E | Calcite within E-W reverse fault | Lower Cretaceous breccias | No  |

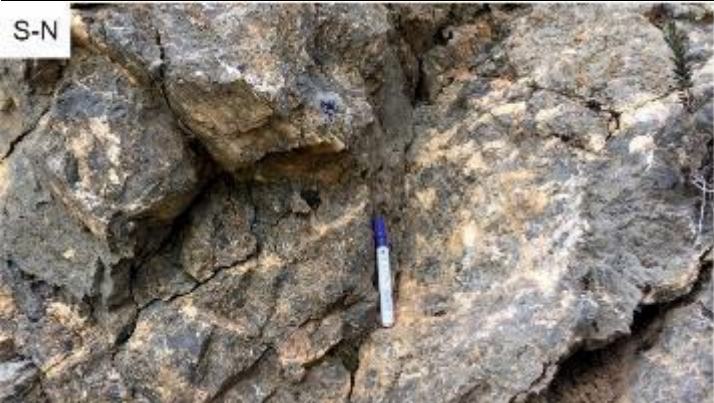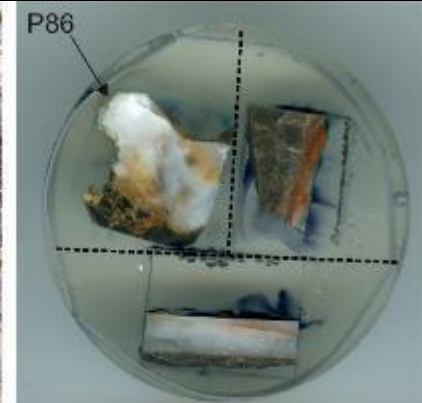

| Sample | Location                      | Description                         | Host rock                         | Age |
|--------|-------------------------------|-------------------------------------|-----------------------------------|-----|
| P2     | 42°14'50.15"N<br>1°42'18.21"E | Calcite within<br>strike-slip fault | Upper<br>Cretaceous<br>limestones | Yes |

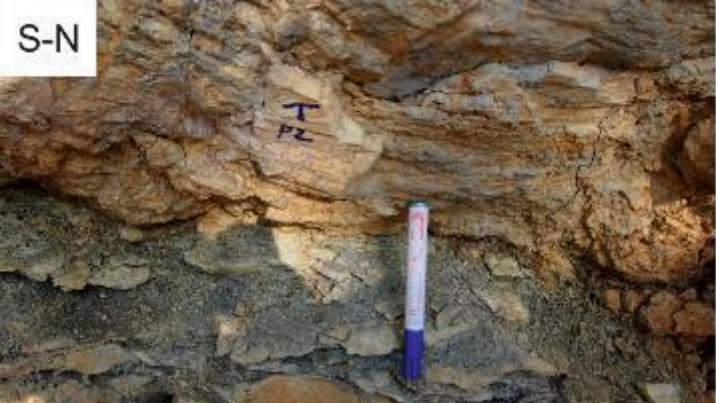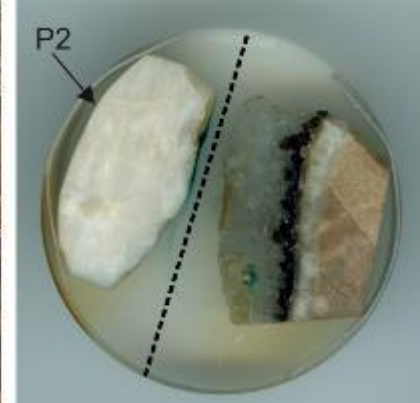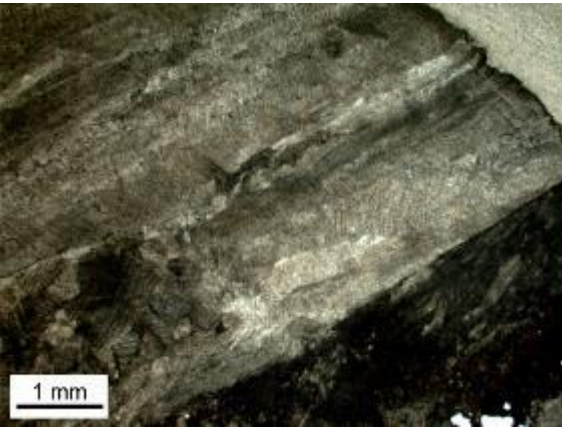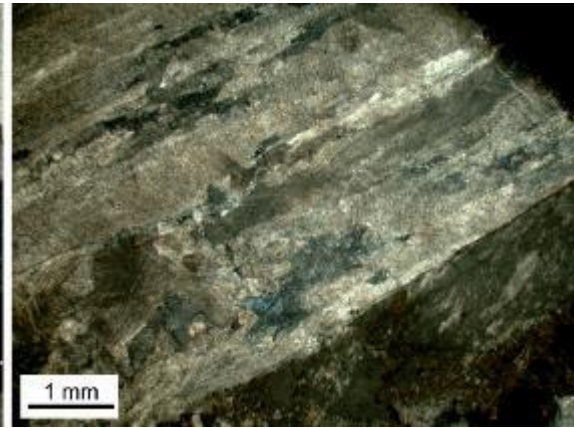

Sample P2: Optical microscope image showing elongated sparite texture parallel to fracture walls.

| Sample | Location                      | Description                   | Host rock                    | Age |
|--------|-------------------------------|-------------------------------|------------------------------|-----|
| P75A   | 42°14'59.03"N<br>1°39'13.20"E | Bed-parallel<br>dolomite vein | Upper Jurassic<br>dolostones | No  |

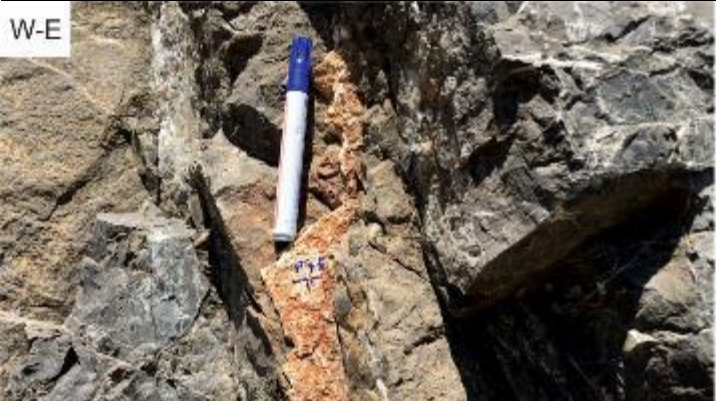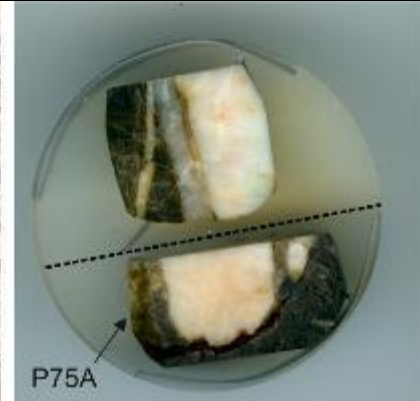

| Sample | Location                      | Description                    | Host rock                         | Age |
|--------|-------------------------------|--------------------------------|-----------------------------------|-----|
| MGT9   | 42°11'53.57"N<br>1° 2'11.19"E | Calcite within<br>normal fault | Lower<br>Cretaceous<br>limestones | Yes |

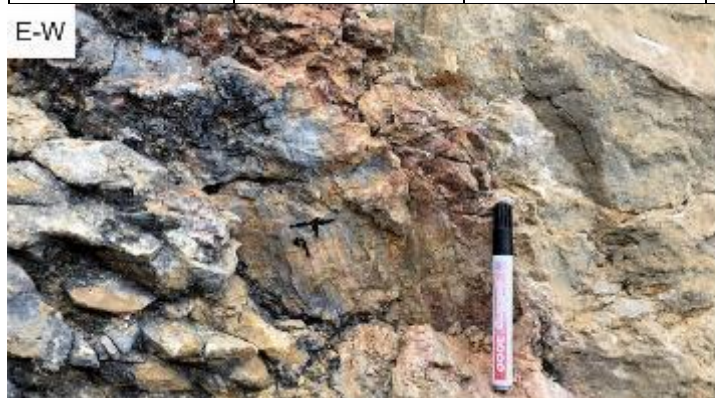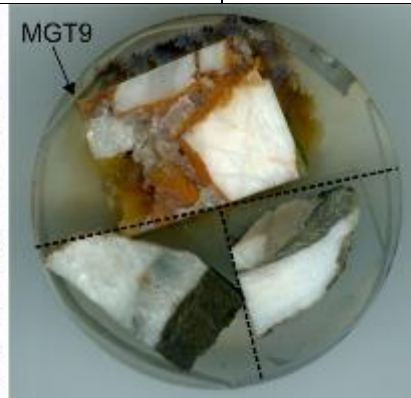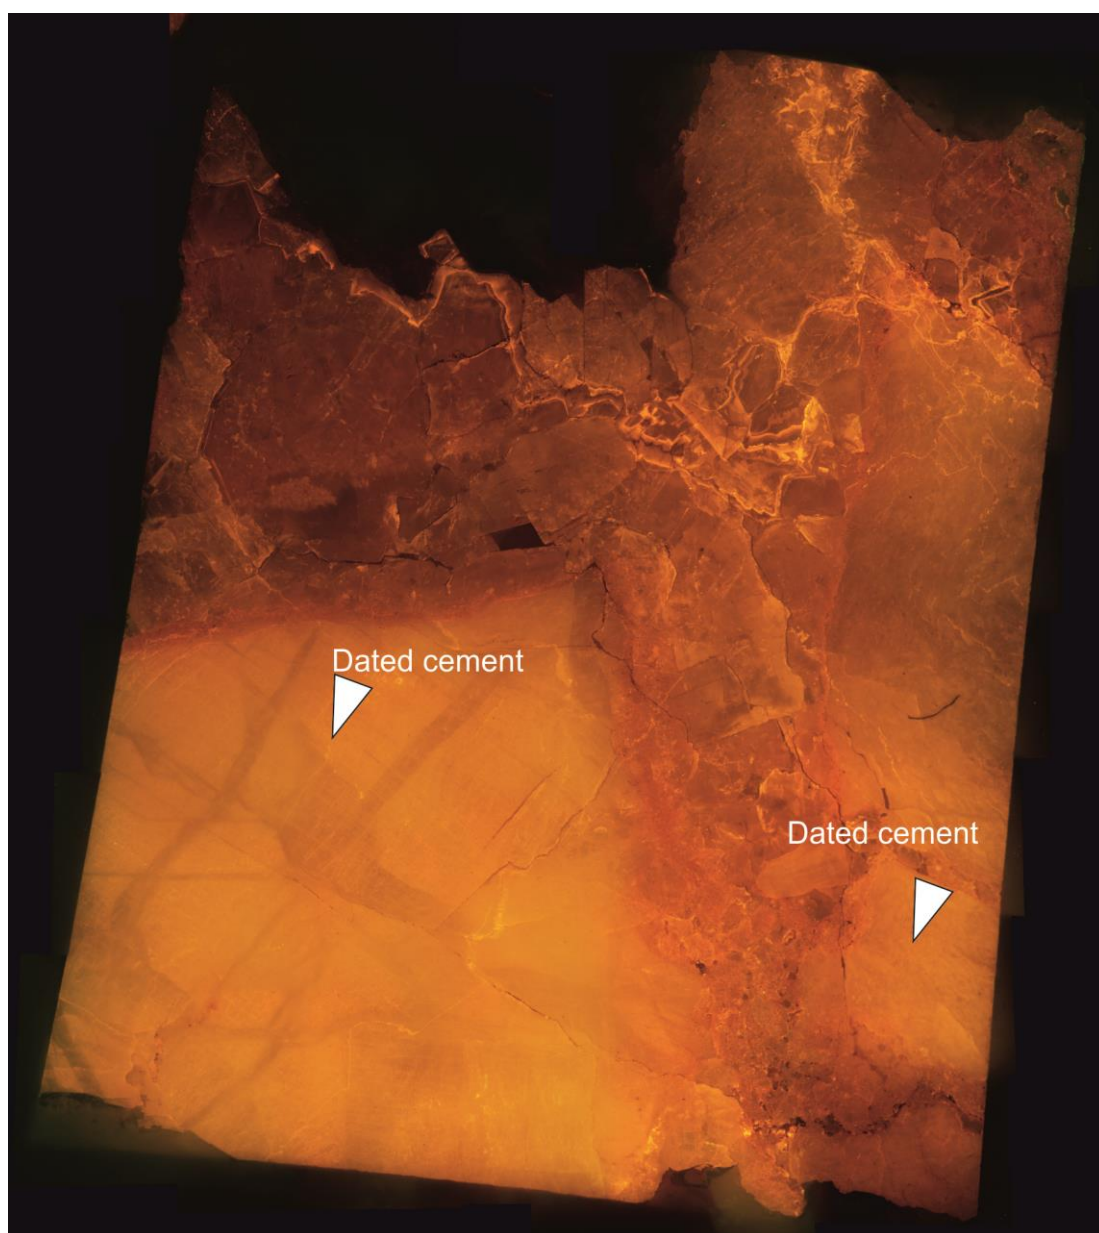

Sample MGT9: Cathodoluminescence image of the analyzed mound showing the blocky texture of aged cements.

| Sample | Location                      | Description      | Host rock                    | Age |
|--------|-------------------------------|------------------|------------------------------|-----|
| P8     | 42°14'39.87"N<br>1°41'52.75"E | N-S calcite vein | Lower Jurassic<br>limestones | Yes |

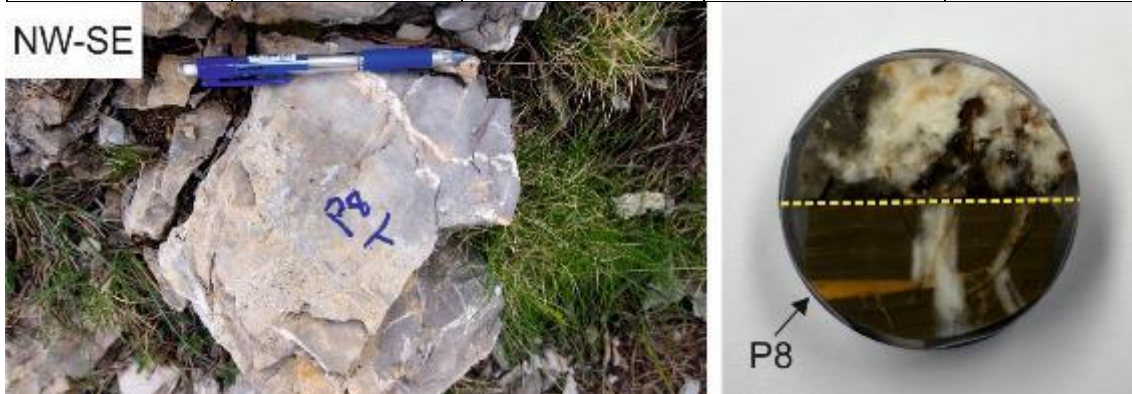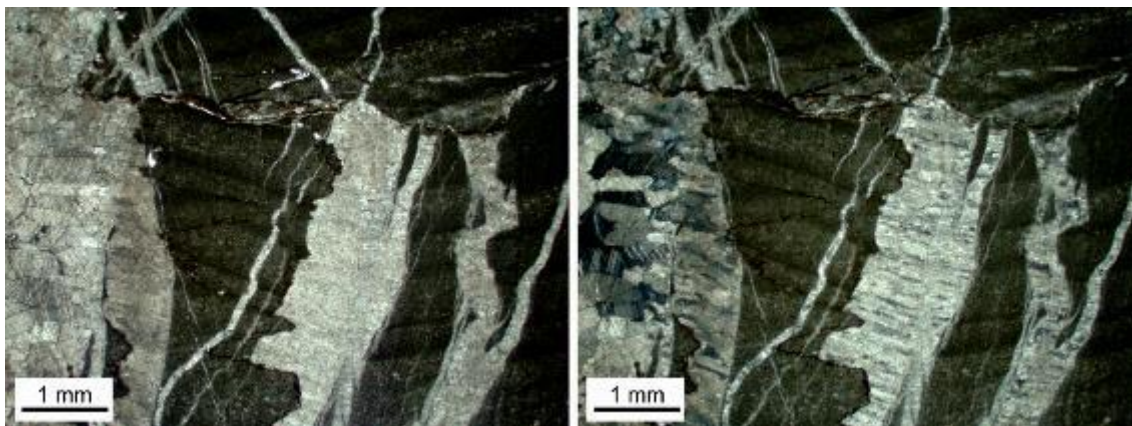

Sample P8: Optical microscope image showing elongated sparite perpendicular to fracture walls.

| Sample     | Location                      | Description                        | Host rock                       | Age |
|------------|-------------------------------|------------------------------------|---------------------------------|-----|
| P82A and B | 42°14'59.00"N<br>1°39'11.84"E | Calcite within E-W<br>normal fault | Lower<br>Cretaceous<br>breccias | No  |

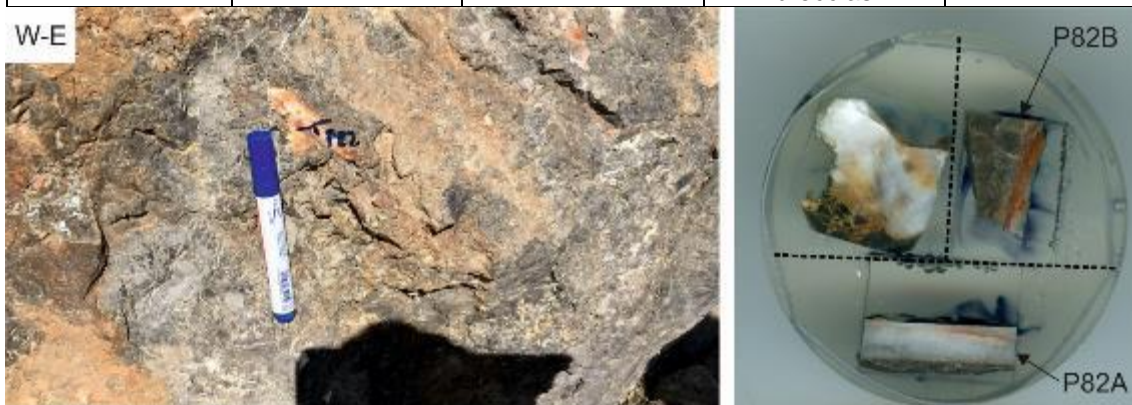

| Sample | Location                      | Description                                 | Host rock                         | Age |
|--------|-------------------------------|---------------------------------------------|-----------------------------------|-----|
| P4     | 42°14'50.15"N<br>1°42'18.21"E | Hydraulic breccia<br>cemented by<br>calcite | Upper<br>Cretaceous<br>limestones | Yes |

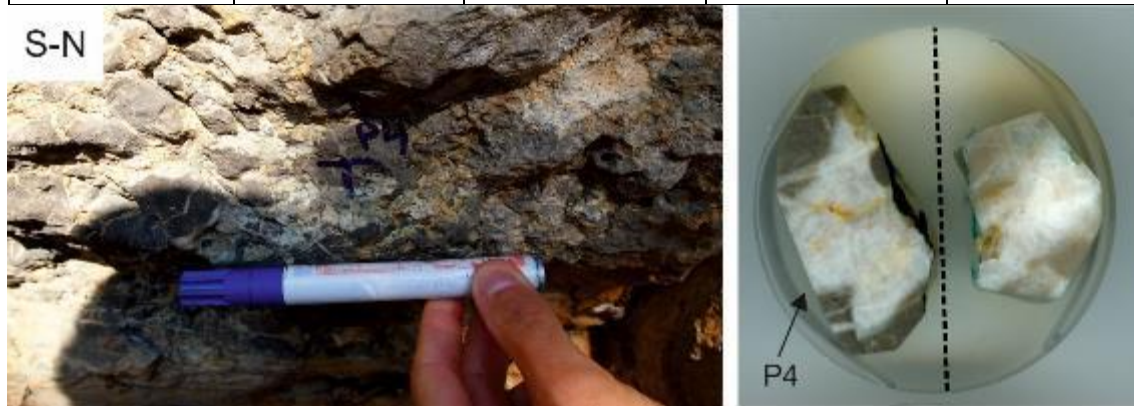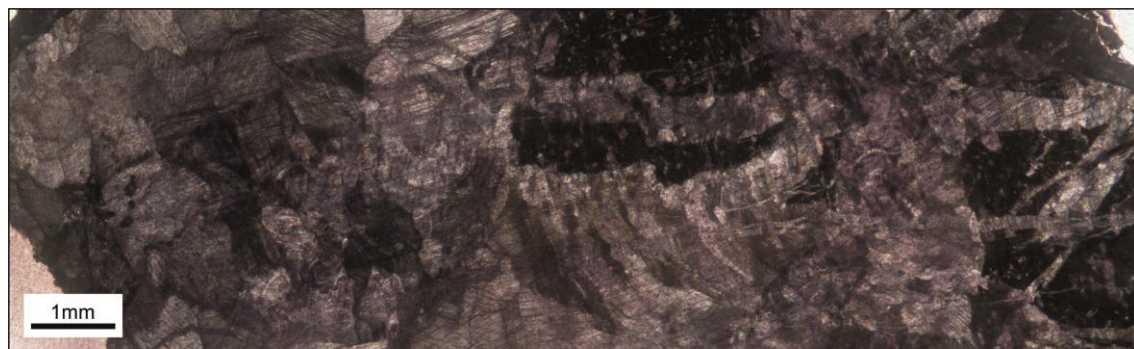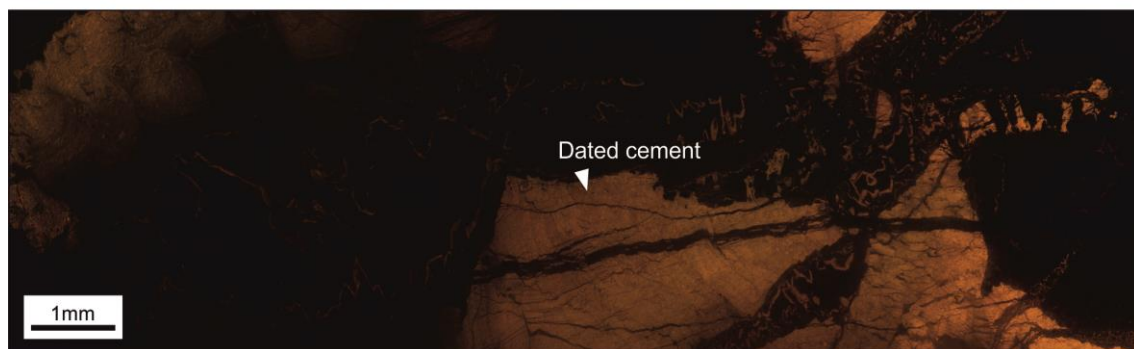

Sample P4: Optical and cathodoluminescence microscope images showing elongated sparite perpendicular to fracture walls and blocky calcite.

| Sample | Location                      | Description            | Host rock               | Age |
|--------|-------------------------------|------------------------|-------------------------|-----|
| P9     | 42°14'39.62"N<br>1°41'52.82"E | Calcite within breccia | Lower Jurassic Breccias | Yes |

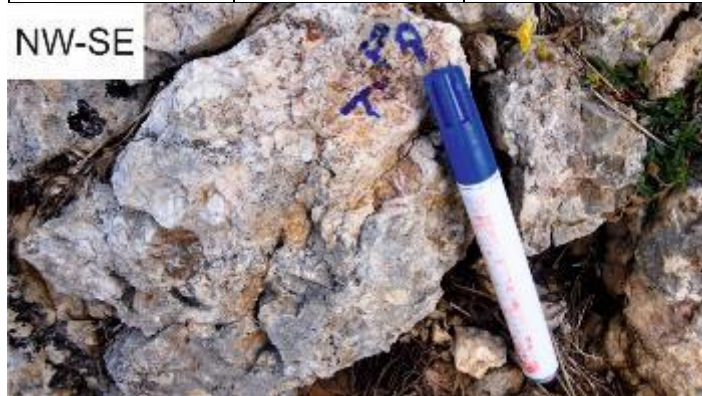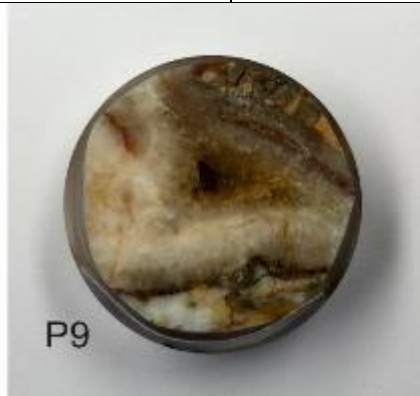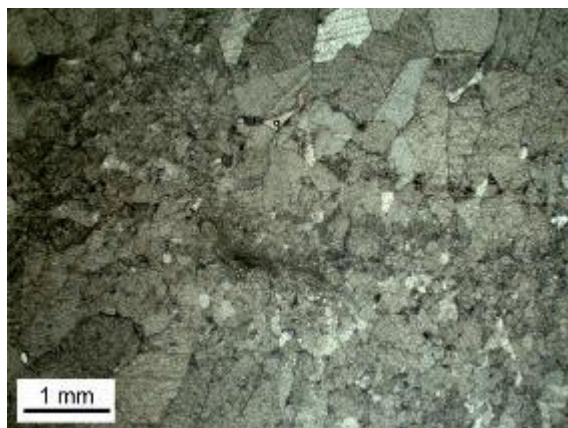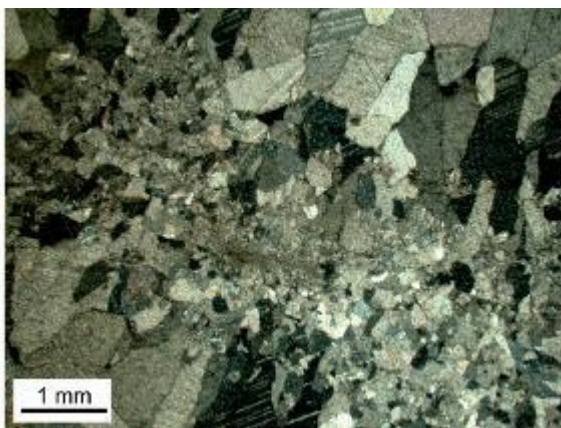

Sample P9: Optical and cathodoluminescence microscope images showing bladed and blocky textures of the analyzed calcite cements.

| Sample | Location                      | Description                         | Host rock                       | Age |
|--------|-------------------------------|-------------------------------------|---------------------------------|-----|
| P12    | 42°13'35.72"N<br>1°42'41.08"E | Calcite within<br>strike-slip fault | Upper<br>Cretaceous<br>Breccias | Yes |

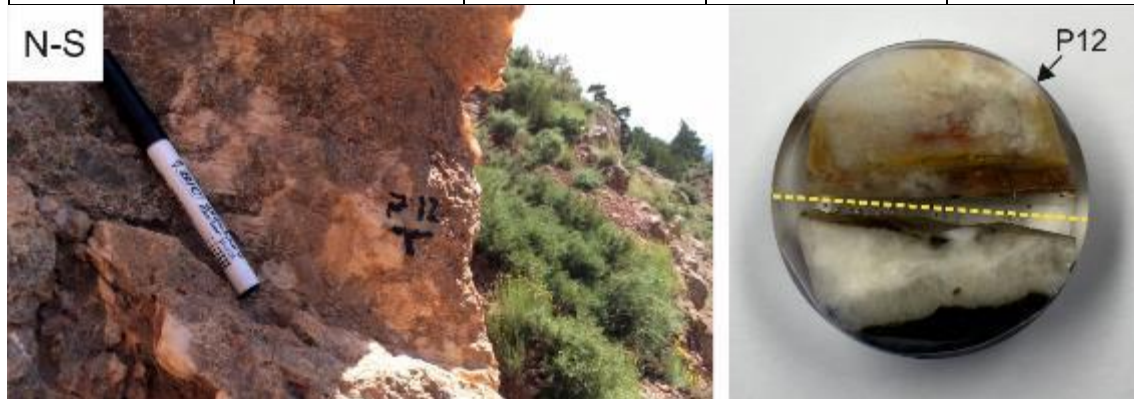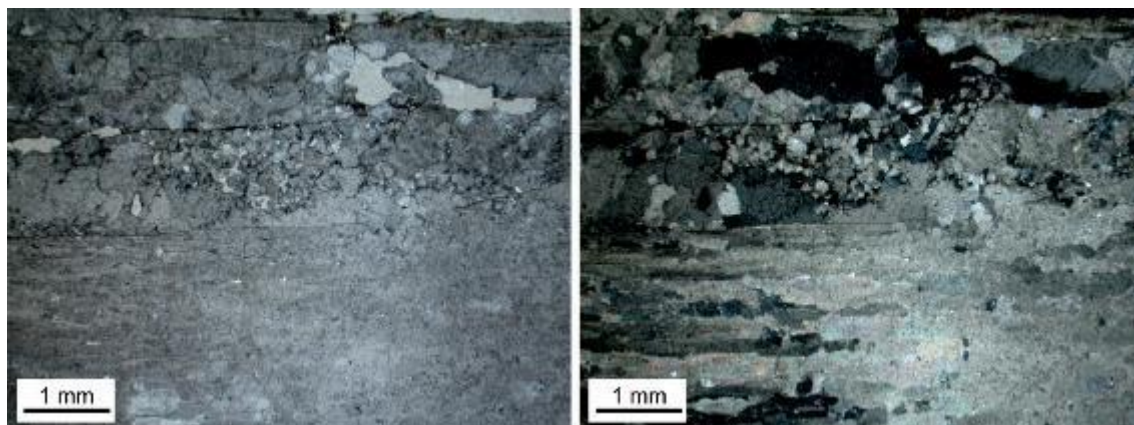

Sample P12: Optical microscope images showing elongated sparite parallel to fracture walls and blocky calcite.

| Sample | Location                     | Description                         | Host rock                 | Age |
|--------|------------------------------|-------------------------------------|---------------------------|-----|
| P14    | 42°13'35.47"N<br>1°42'41.62" | Calcite within<br>strike-slip fault | Upper<br>Cretaceous marls | Yes |

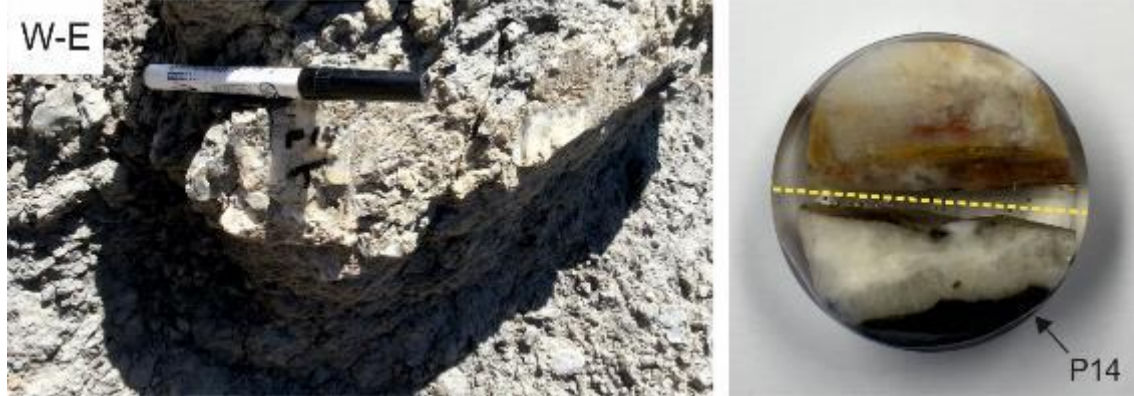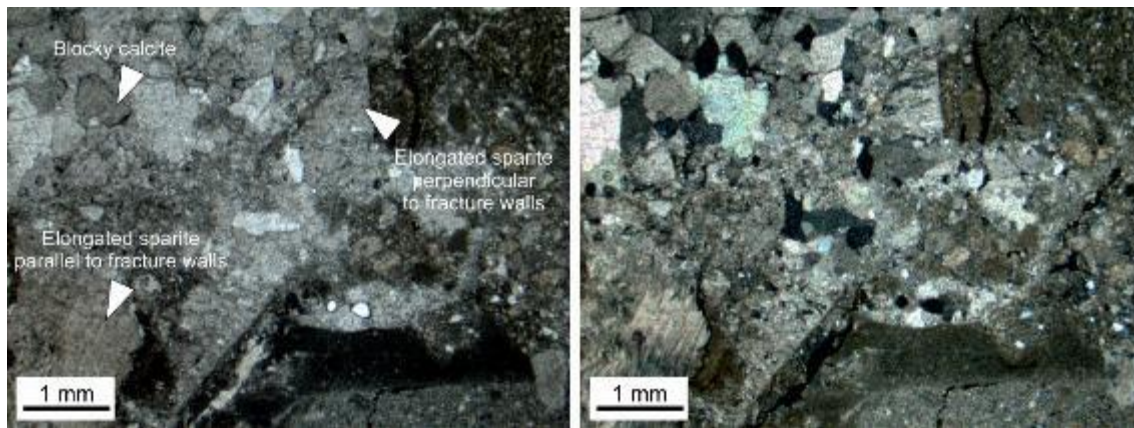

Sample P14: Optical microscope images showing blocky and elongated sparite perpendicular and parallel to fracture walls textures of aged cement.

| Sample | Location                      | Description      | Host rock                         | Age |
|--------|-------------------------------|------------------|-----------------------------------|-----|
| P44    | 42°13'14.60"N<br>1°41'12.57"E | N-S calcite vein | Upper<br>Cretaceous<br>siltstones | Yes |

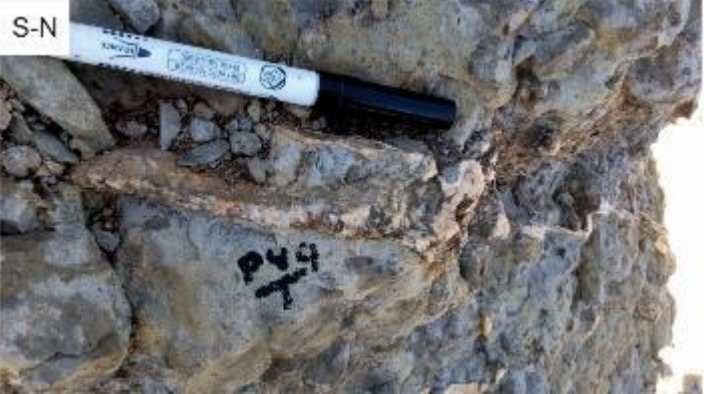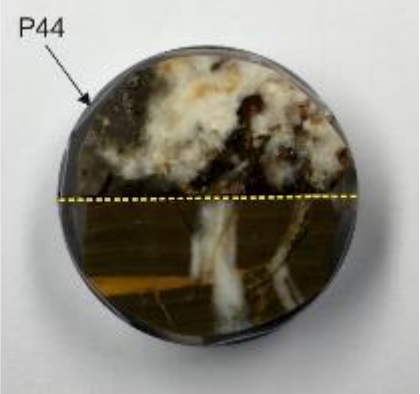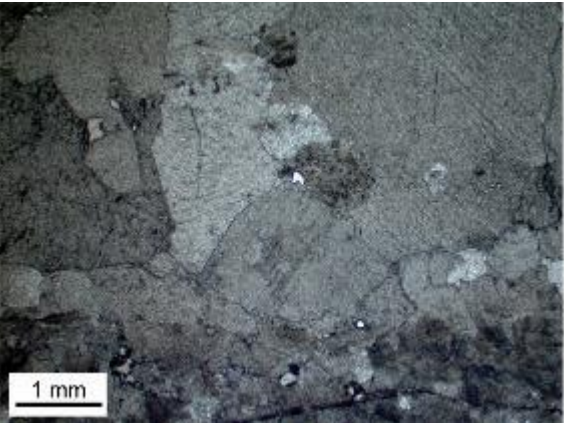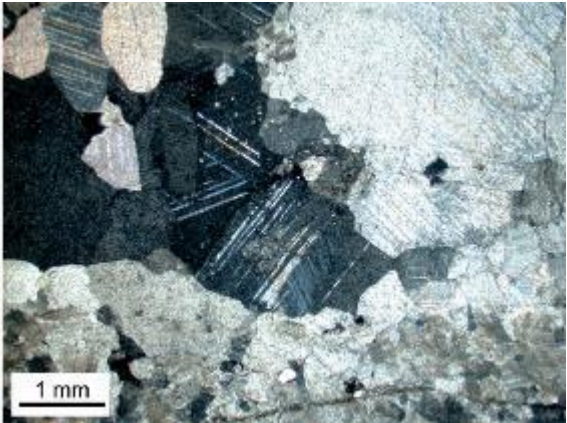

Sample P44: Optical microscope images and blocky texture of analyzed the calcite cement.

| Sample | Location                     | Description                     | Host rock                       | Age |
|--------|------------------------------|---------------------------------|---------------------------------|-----|
| P21    | 42°14'59.03"N<br>1°39'5.60"E | Calcite within<br>reverse fault | Lower<br>Cretaceous<br>breccias | Yes |

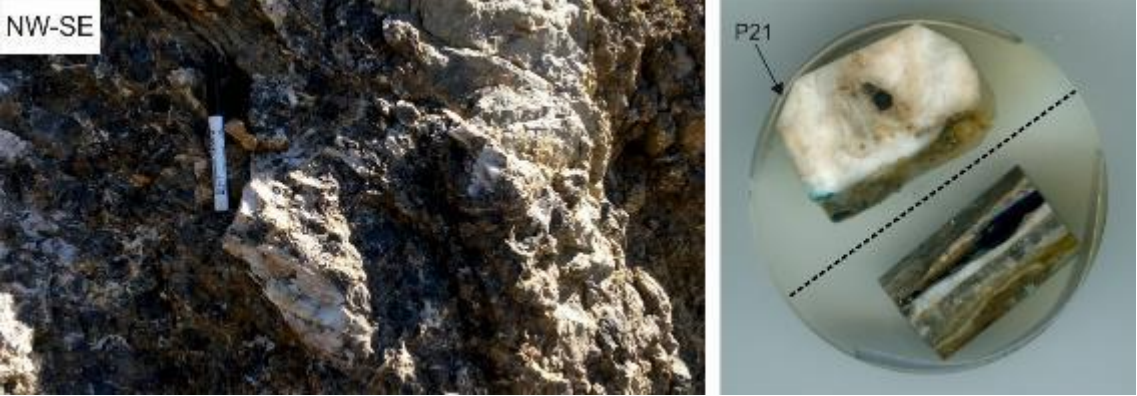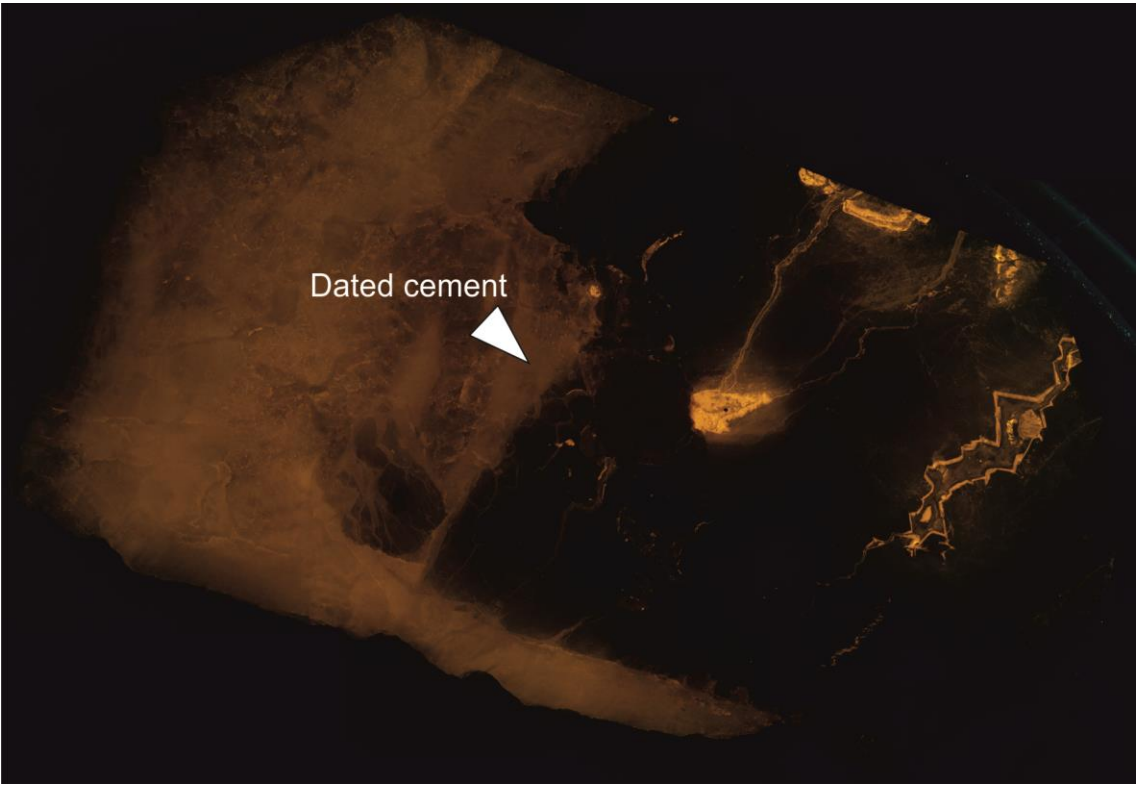

Sample P21: Cathodoluminescence image of the analyzed mound showing the blocky texture of aged cements.

| Sample | Location                      | Description                                        | Host rock                    | Age |
|--------|-------------------------------|----------------------------------------------------|------------------------------|-----|
| P24    | 42°14'58.92"N<br>1°39'14.55"E | N-S dolomite vein<br>predating N-S<br>calcite vein | Upper Jurassic<br>dolostones | Yes |

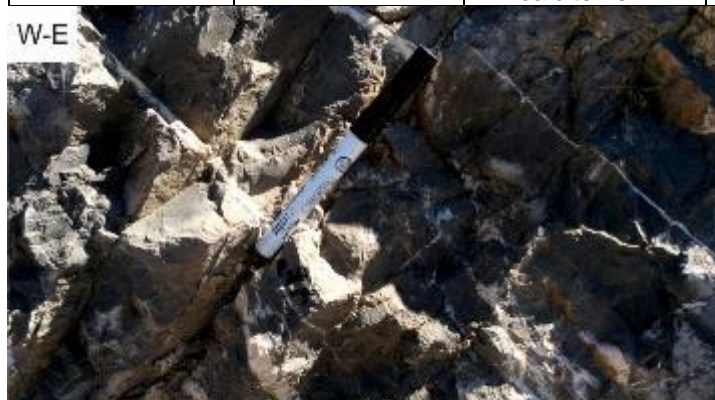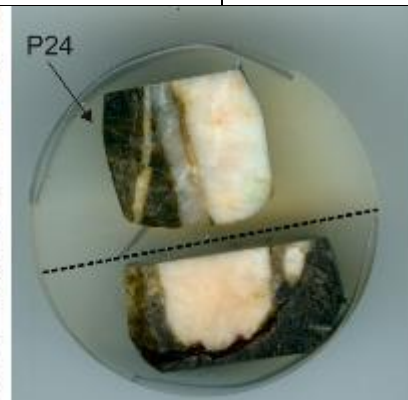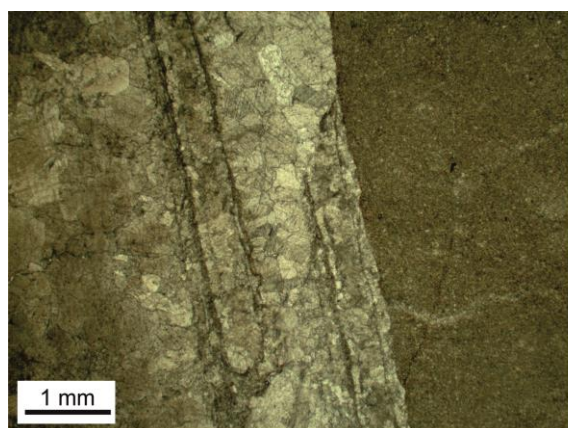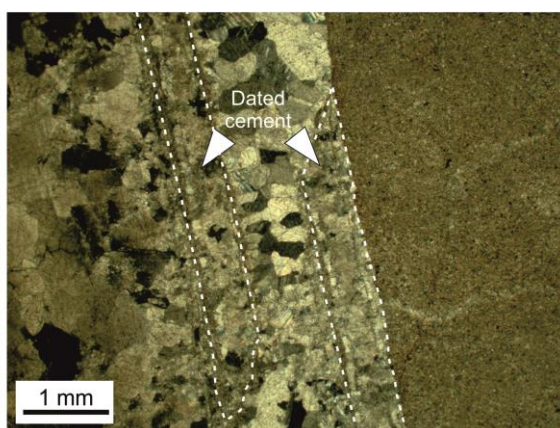

Sample P24: Optical microscope images of blocky texture of the analyzed calcite cement.

| Sample | Location                      | Description  | Host rock                       | Age |
|--------|-------------------------------|--------------|---------------------------------|-----|
| P63    | 42°14'31.10"N<br>1°41'55.27"E | Karst cavity | Lower<br>Cretaceous<br>breccias | Yes |

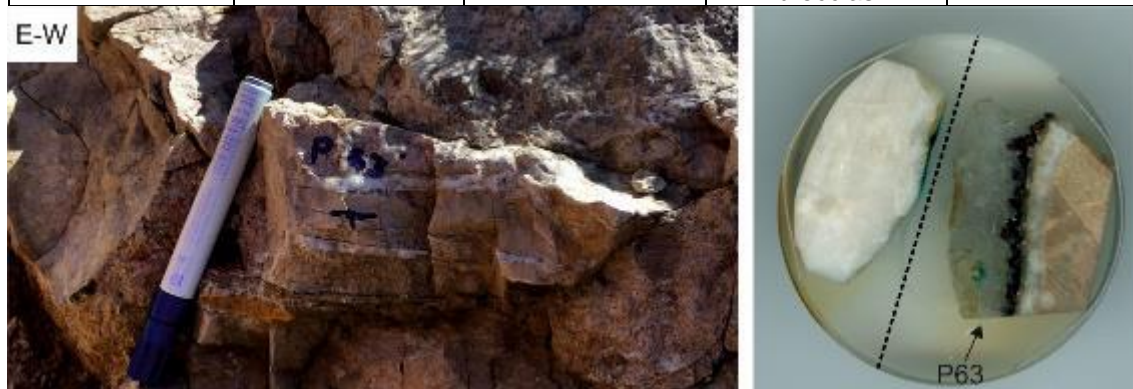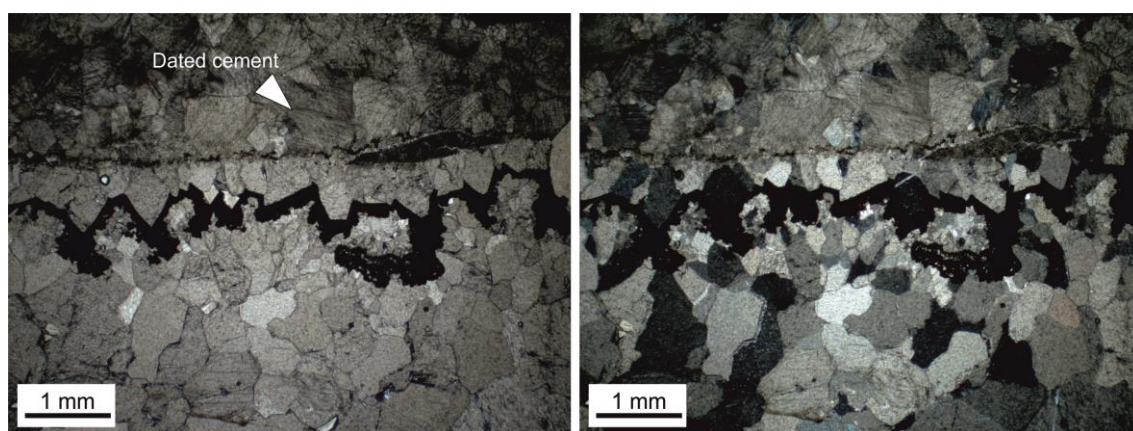

Sample P63: Optical microscope images of blocky texture of the analyzed calcite cement.

**Lower Pedraforca thrust sheet**

| Sample | Location                      | Description                               | Host rock                  | Age |
|--------|-------------------------------|-------------------------------------------|----------------------------|-----|
| EST2   | 42°15'27.89"N<br>1°41'15.31"E | Calcite within<br>NNW-SSE<br>normal fault | Oligocene<br>conglomerates | Yes |

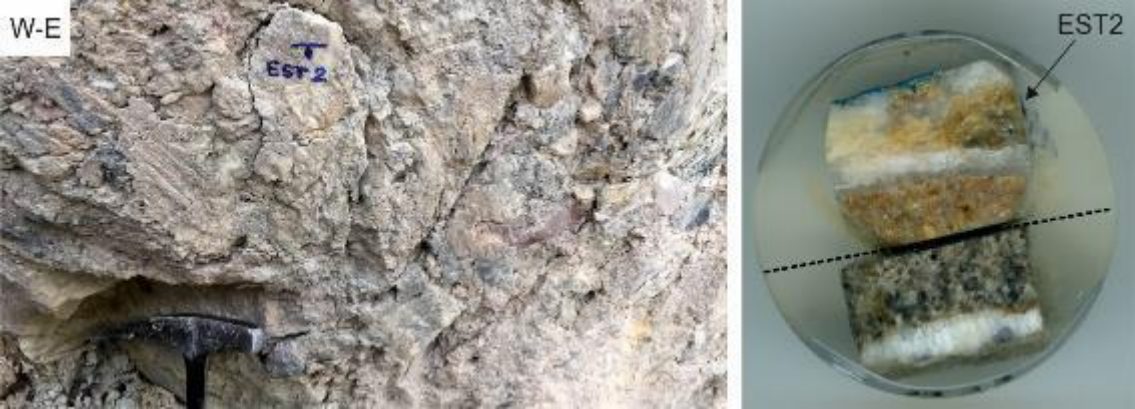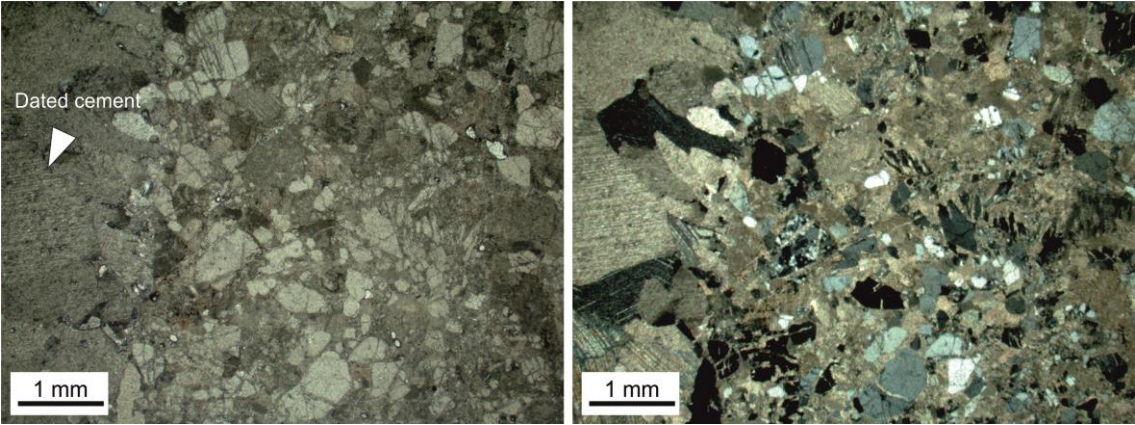

Sample EST2: Optical microscope images of blocky texture of the analyzed calcite cement.

| Sample | Location                      | Description      | Host rock                    | Age |
|--------|-------------------------------|------------------|------------------------------|-----|
| G3     | 42° 7'55.99"N<br>1°51'45.57"E | N-S calcite vein | Lower Jurassic<br>limestones | Yes |

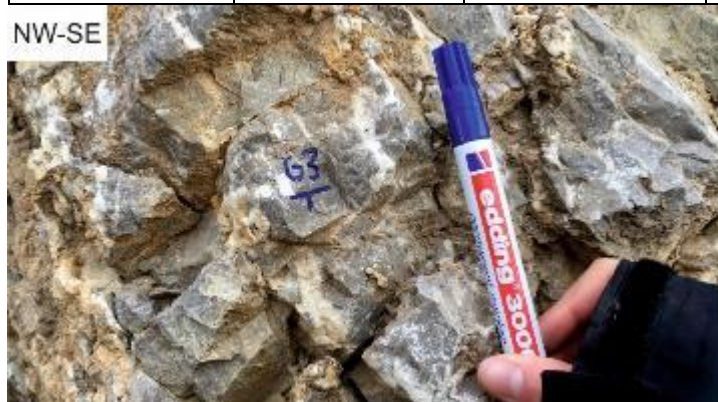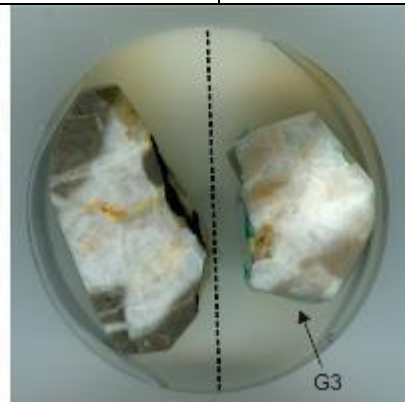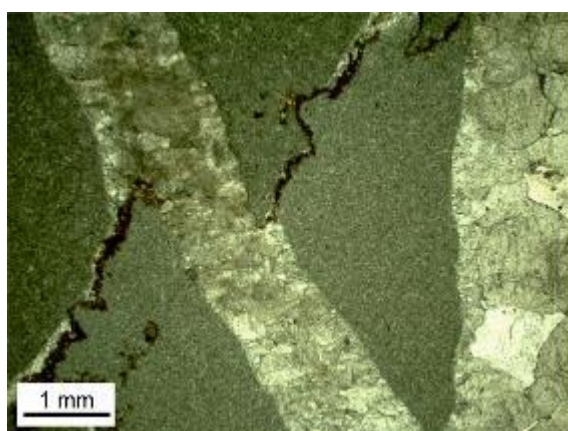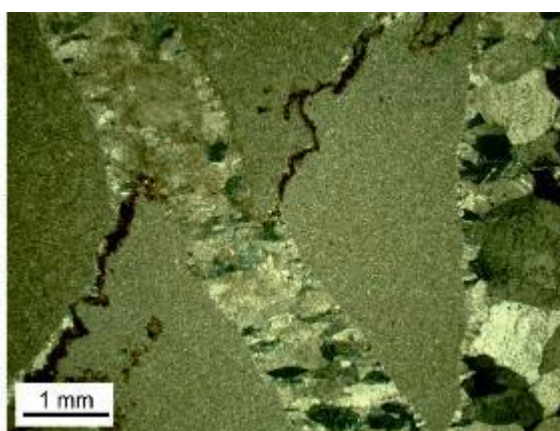

Sample G33: Optical microscope images of blocky and elongated sparite textures of the analyzed calcite cement.

| Sample | Location                      | Description                         | Host rock                         | Age |
|--------|-------------------------------|-------------------------------------|-----------------------------------|-----|
| G4     | 42° 7'56.49"N<br>1°51'47.59"E | Calcite within<br>strike-slip fault | Upper<br>Cretaceous<br>limestones | No  |

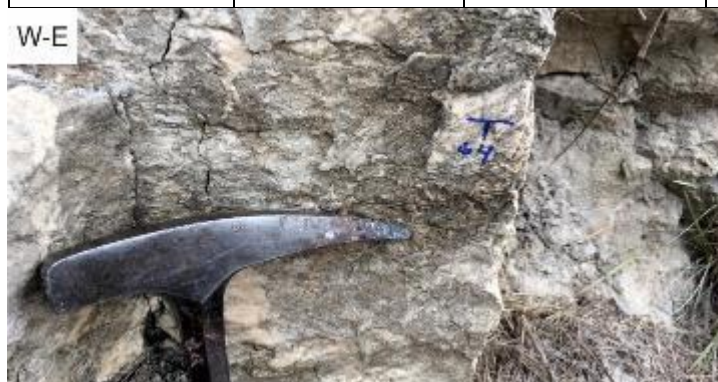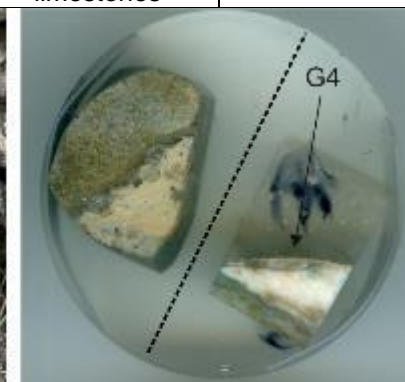

| Sample | Location                      | Description                     | Host rock                    | Age |
|--------|-------------------------------|---------------------------------|------------------------------|-----|
| G15    | 42°14'16.70"N<br>1°51'55.89"E | Calcite within<br>reverse fault | Lower Jurassic<br>limestones | Yes |

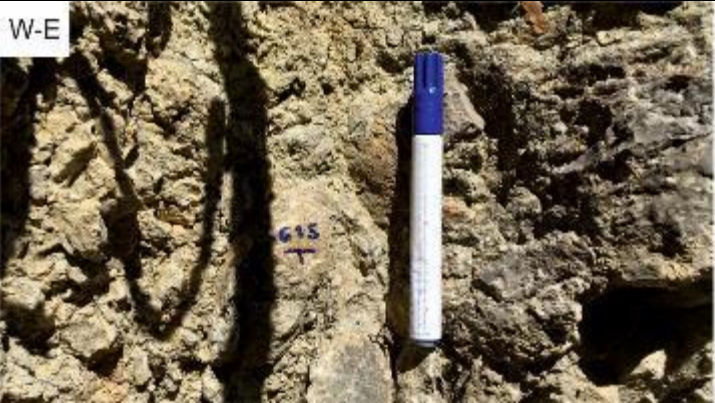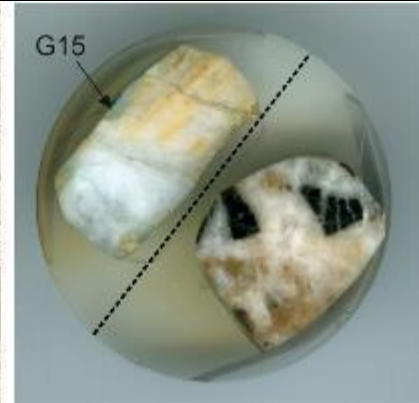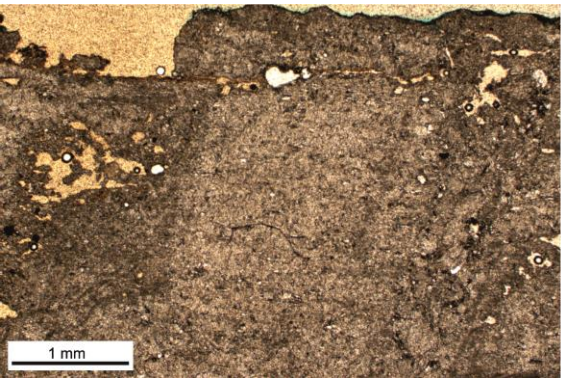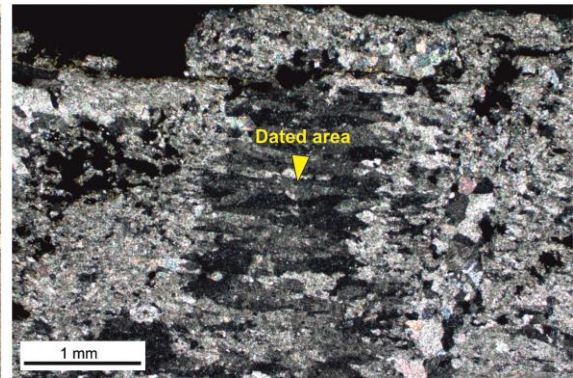

Sample G15: Optical microscope image showing elongated sparite parallel to fracture walls.

| Sample | Location                      | Description                     | Host rock               | Age |
|--------|-------------------------------|---------------------------------|-------------------------|-----|
| PEG1   | 42° 9'52.60"N<br>1°45'37.50"E | Calcite within<br>reverse fault | Paleocene<br>limestones | No  |

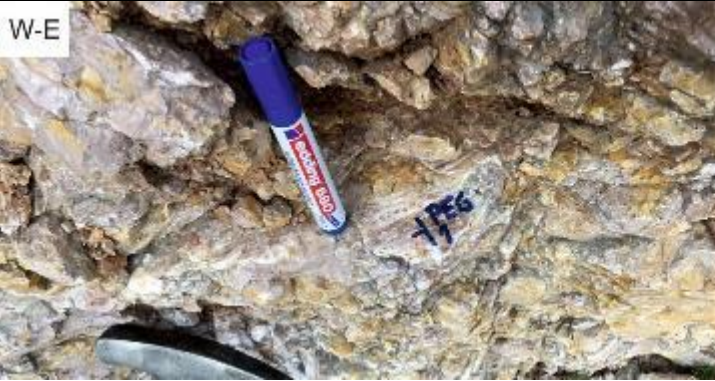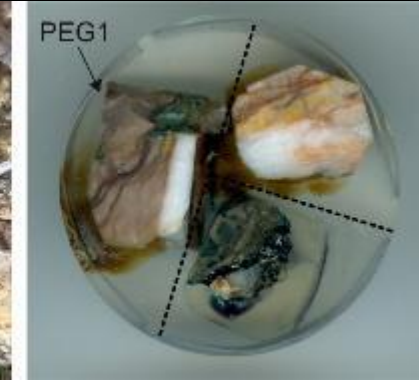

| Sample | Location                      | Description                     | Host rock               | Age |
|--------|-------------------------------|---------------------------------|-------------------------|-----|
| PEG4   | 42° 9'52.60"N<br>1°45'37.50"E | Calcite within<br>reverse fault | Paleocene<br>limestones | No  |

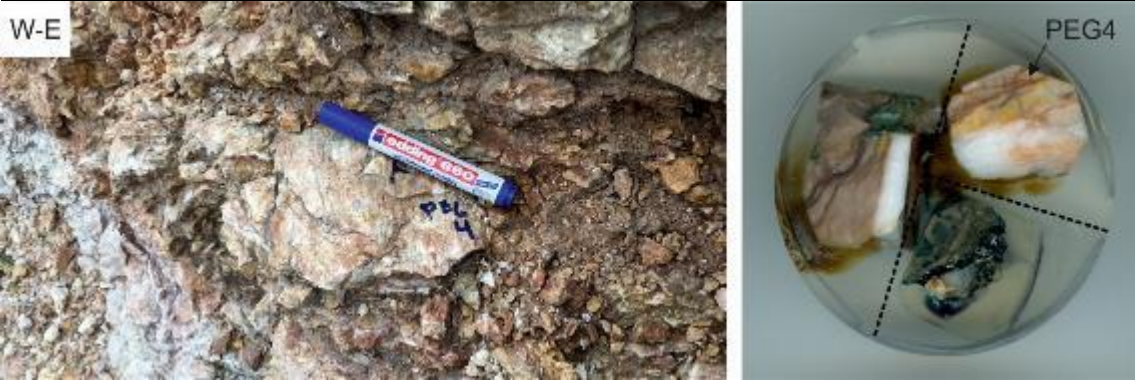

| Sample        | Location                      | Description                     | Host rock                         | Age                     |
|---------------|-------------------------------|---------------------------------|-----------------------------------|-------------------------|
| Q3-1 and Q3-2 | 42° 6'37.28"N<br>1°49'27.69"E | Calcite within<br>reverse fault | Upper<br>Cretaceous<br>limestones | Q3-1 = Yes<br>Q3-2 = No |

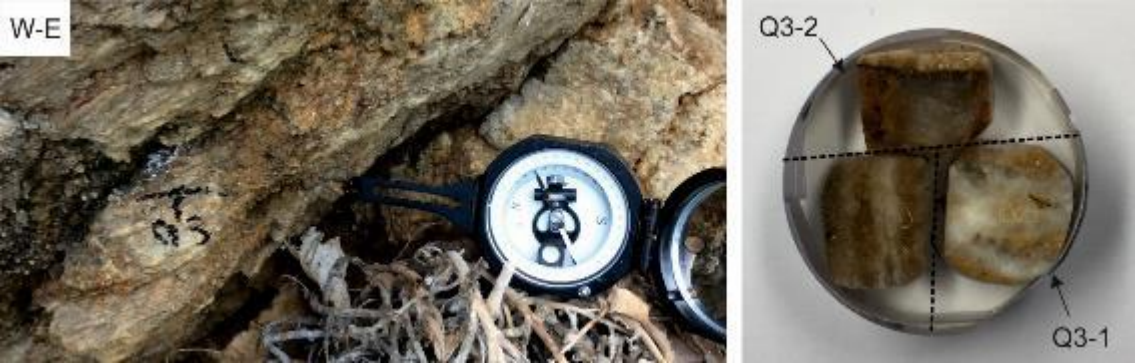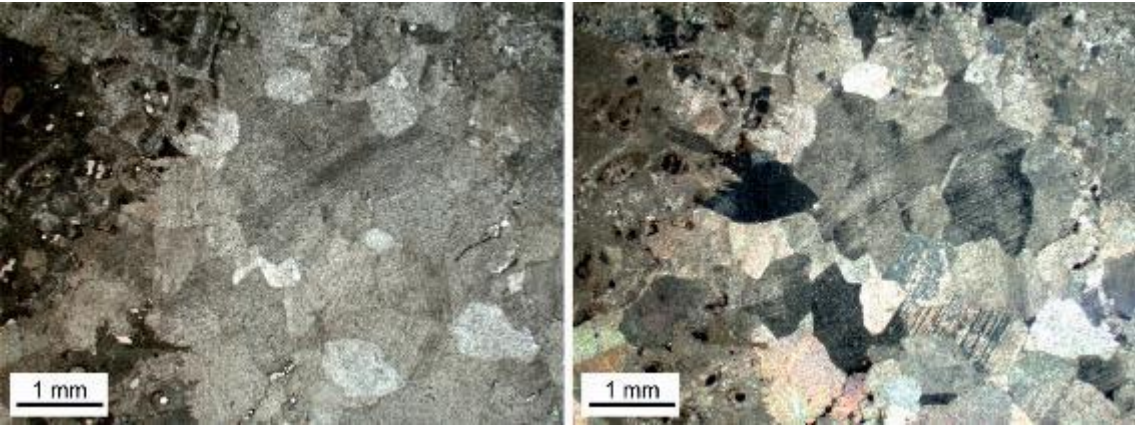

Sample Q3-1: Optical microscope images of blocky texture of the analyzed calcite cement.

| Sample | Location                      | Description      | Host rock                | Age |
|--------|-------------------------------|------------------|--------------------------|-----|
| Q11    | 42° 6'26.46"N<br>1°49'35.42"E | E-W calcite vein | Middle Eocene sandstones | Yes |

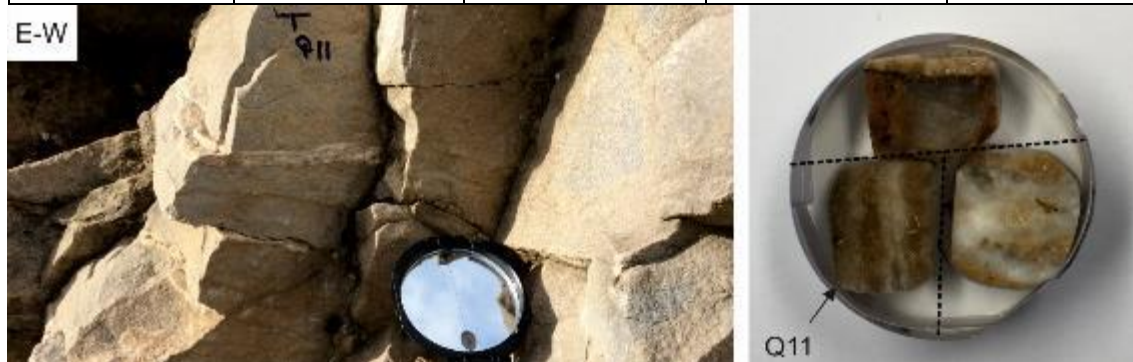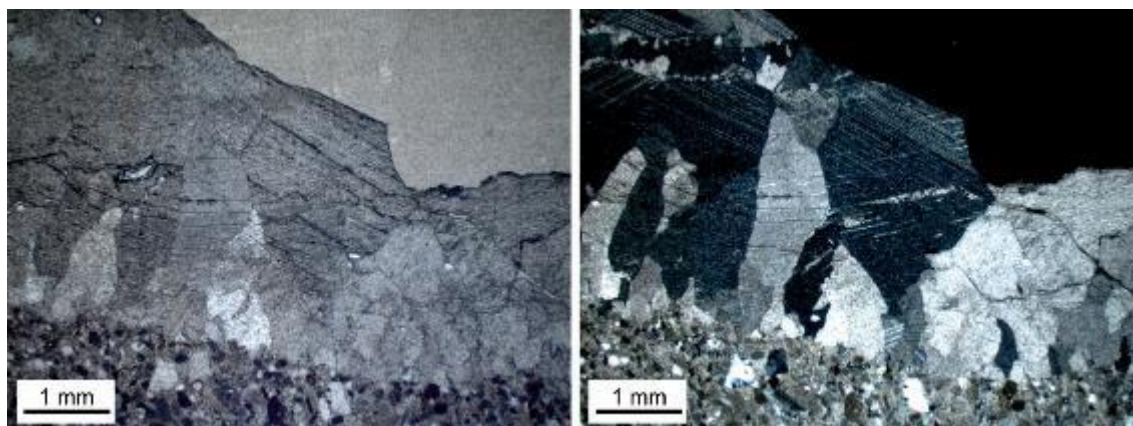

Sample Q11: Optical microscope images of blocky and bladed textures of the analyzed calcite cement.

| Sample | Location                     | Description                     | Host rock                         | Age |
|--------|------------------------------|---------------------------------|-----------------------------------|-----|
| Q24    | 42° 7'0.88"N<br>1°50'34.71"E | Calcite within<br>reverse fault | Upper<br>Cretaceous<br>limestones | Yes |

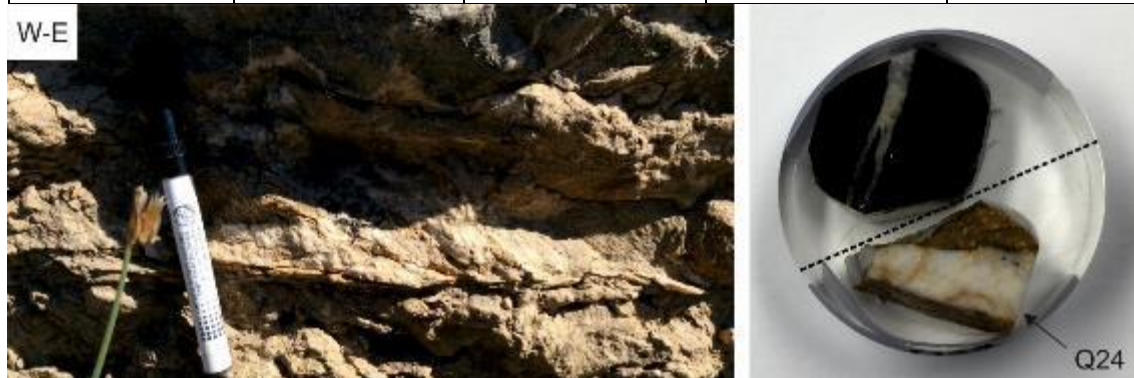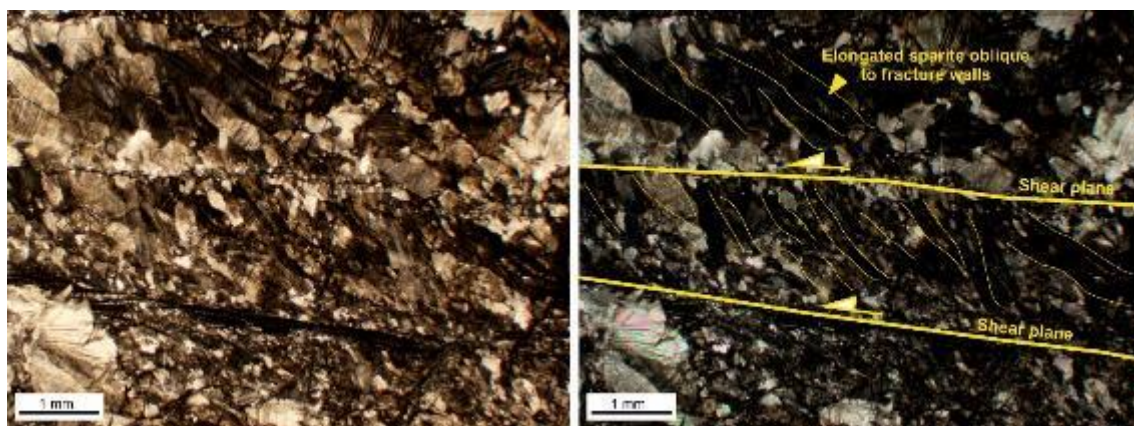

Sample Q24: Optical microscope image showing elongated sparite oblique to fracture walls.

| Sample | Location                      | Description      | Host rock                         | Age |
|--------|-------------------------------|------------------|-----------------------------------|-----|
| Q27    | 42° 6'38.01"N<br>1°49'26.53"E | N-S calcite vein | Upper<br>Cretaceous<br>limestones | Yes |

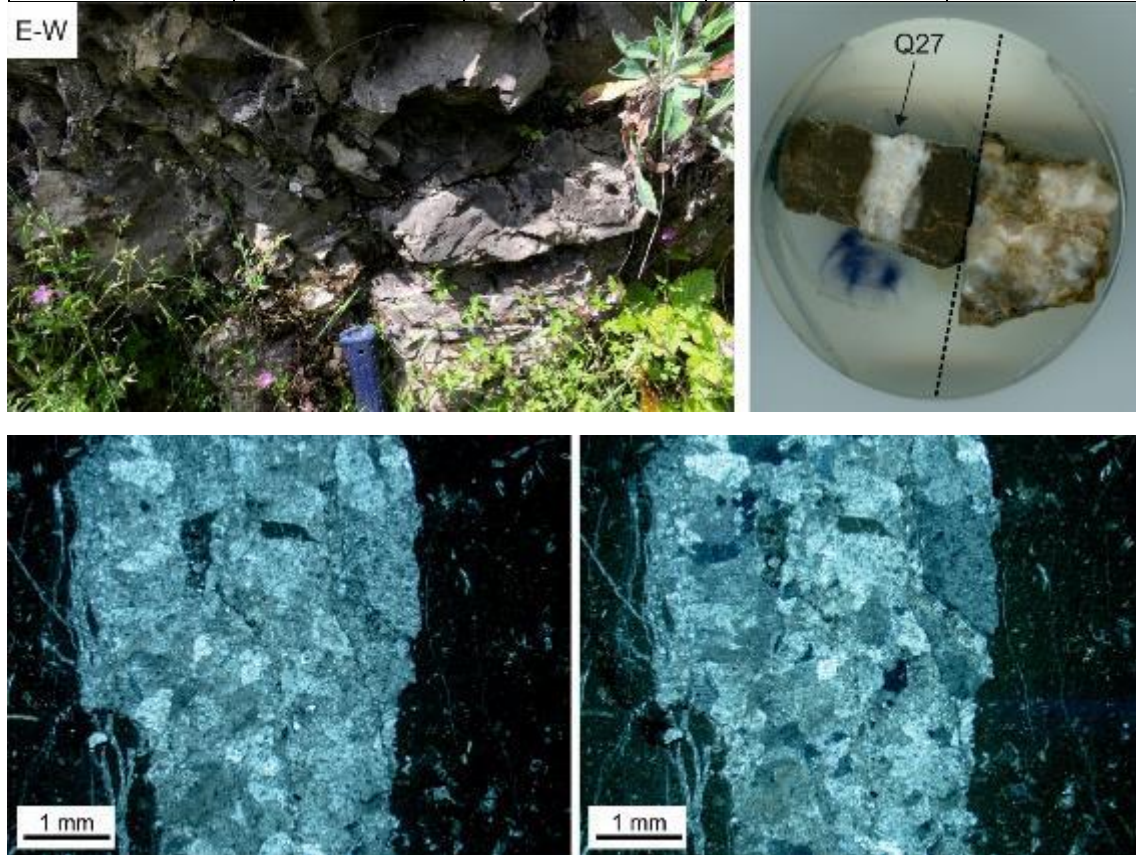

Sample Q27: Optical microscope images of blocky texture of the analyzed calcite cement.

| Sample | Location                     | Description                     | Host rock                         | Age |
|--------|------------------------------|---------------------------------|-----------------------------------|-----|
| Q29    | 42° 7'5.30"N<br>1°50'38.26"E | Calcite within<br>reverse fault | Upper<br>Cretaceous<br>limestones | Yes |

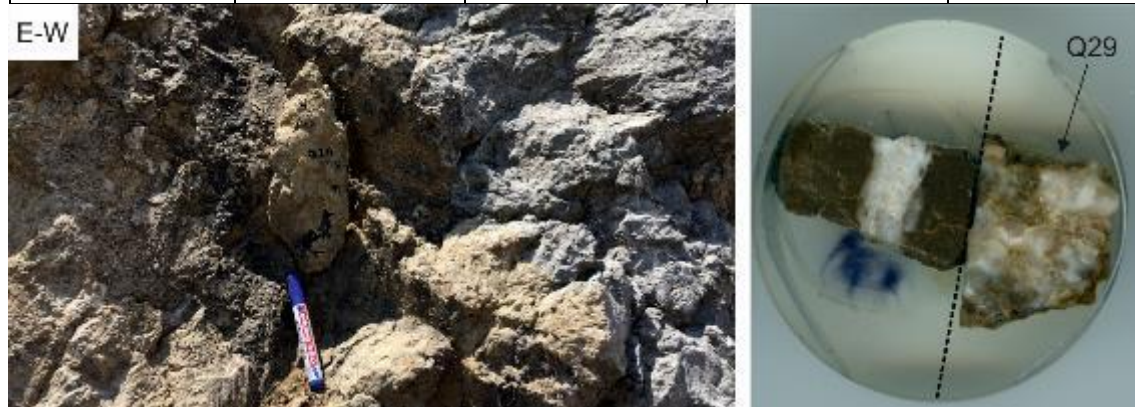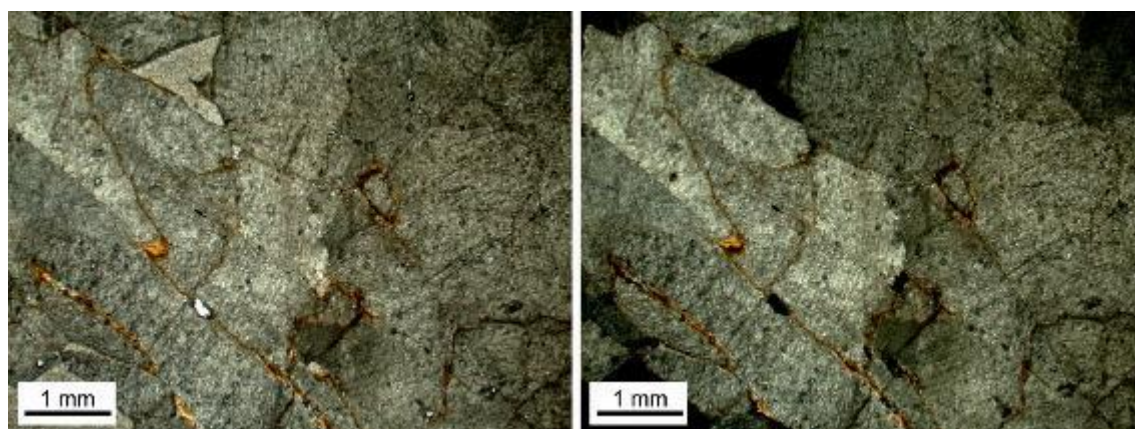

Sample Q29: Optical microscope images of blocky texture of the analyzed calcite cement.

| Sample | Location                      | Description      | Host rock                   | Age |
|--------|-------------------------------|------------------|-----------------------------|-----|
| Q33    | 42° 6'26.26"N<br>1°49'35.74"E | N-S calcite vein | Middle Eocene<br>sandstones | Yes |

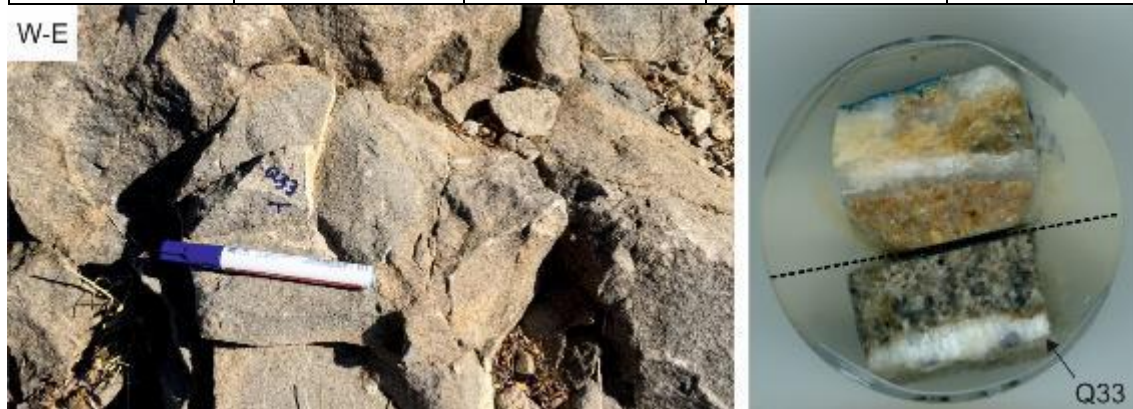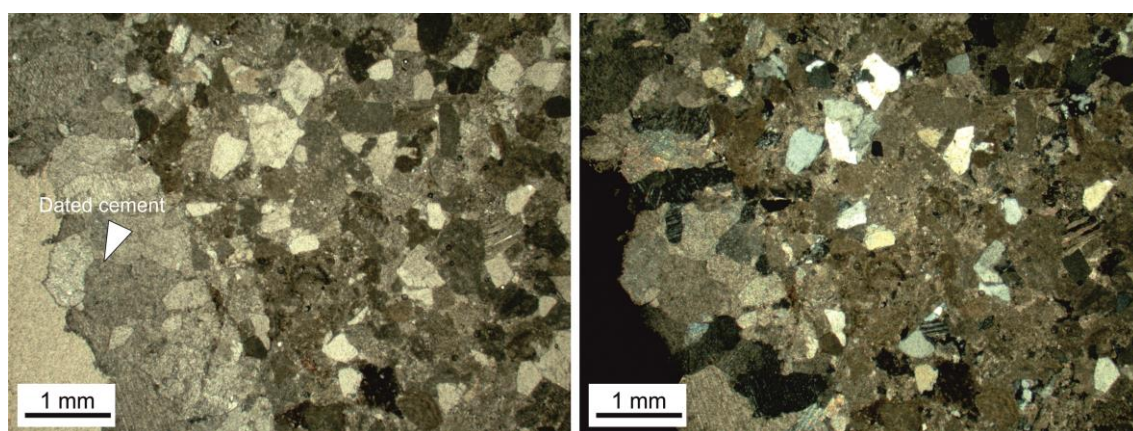

Sample Q33: Optical microscope images of blocky texture of the analyzed calcite cement.

**Cadí thrust sheet**

| Sample | Location                    | Description                           | Host rock                   | Age |
|--------|-----------------------------|---------------------------------------|-----------------------------|-----|
| B2     | 42°16'4.45"N<br>1°51'5.53"E | E-W calcite veins<br>and vug porosity | Middle Eocene<br>limestones | Yes |

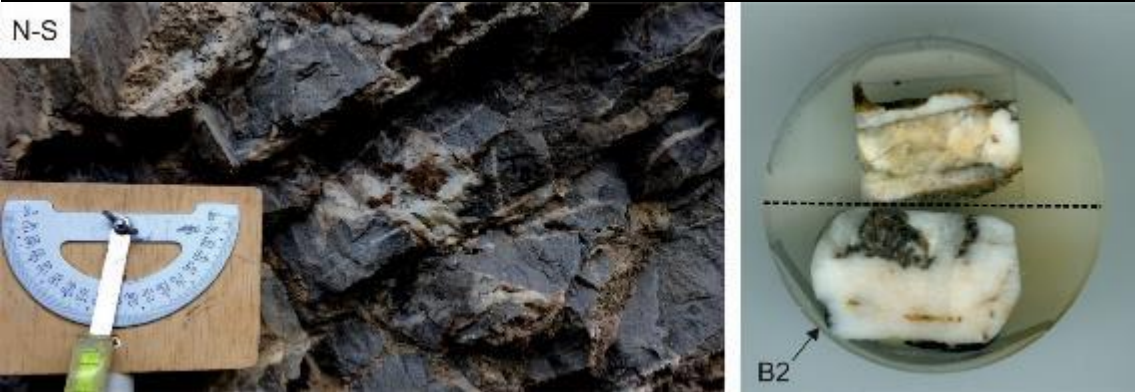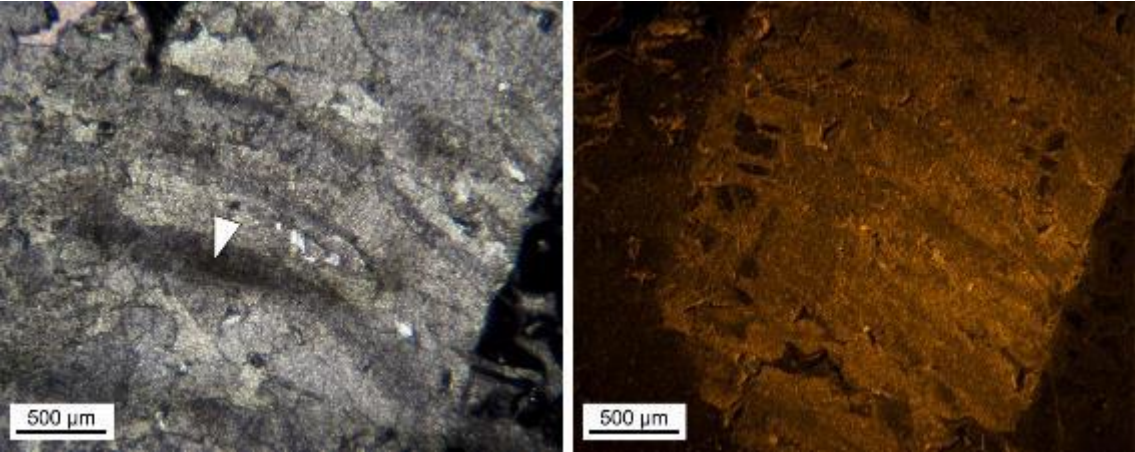

Sample B2: Optical and cathodoluminescence microscope images showing the elongated sparite texture perpendicular to fracture walls of the aged cement.

| Sample | Location                    | Description      | Host rock                  | Age |
|--------|-----------------------------|------------------|----------------------------|-----|
| B1     | 42°16'4.45"N<br>1°51'5.53"E | N-S calcite vein | Lower Eocene<br>limestones | No  |

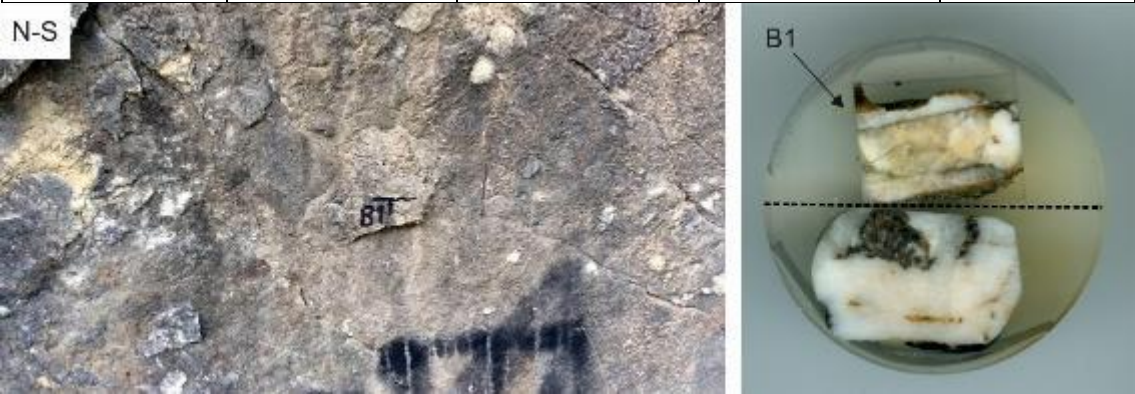

| Sample | Location                      | Description      | Host rock                  | Age |
|--------|-------------------------------|------------------|----------------------------|-----|
| B22    | 42°15'43.66"N<br>1°52'24.92"E | E-W calcite vein | Lower Eocene<br>limestones | Yes |

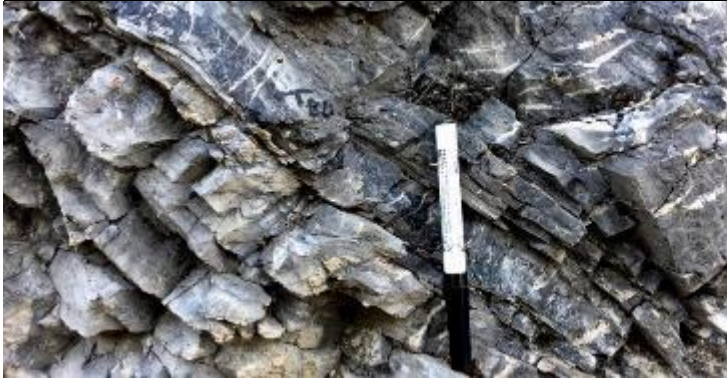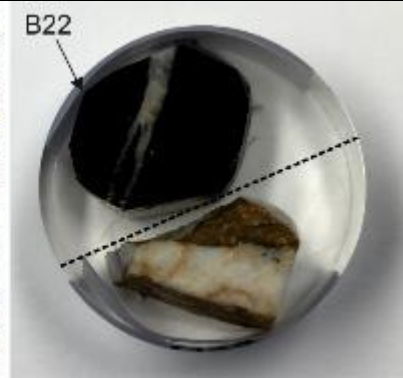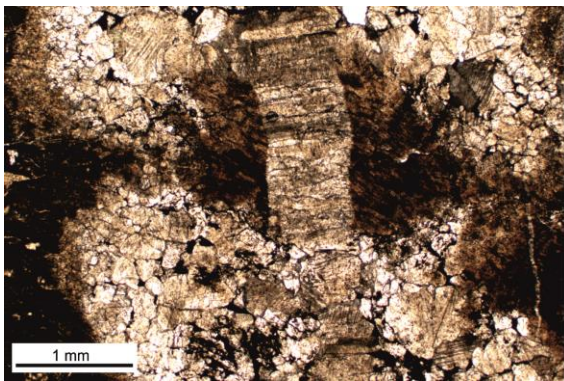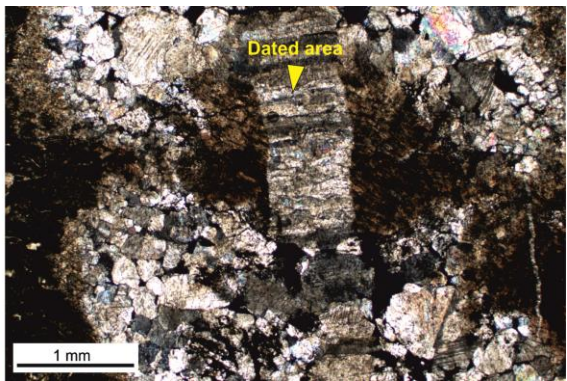

Sample B22: Optical microscope image showing elongated sparite perpendicular to fracture walls.

| Sample | Location                      | Description      | Host rock                  | Age |
|--------|-------------------------------|------------------|----------------------------|-----|
| B24    | 42°15'43.67"N<br>1°52'24.47"E | E-W calcite vein | Lower Eocene<br>limestones | No  |

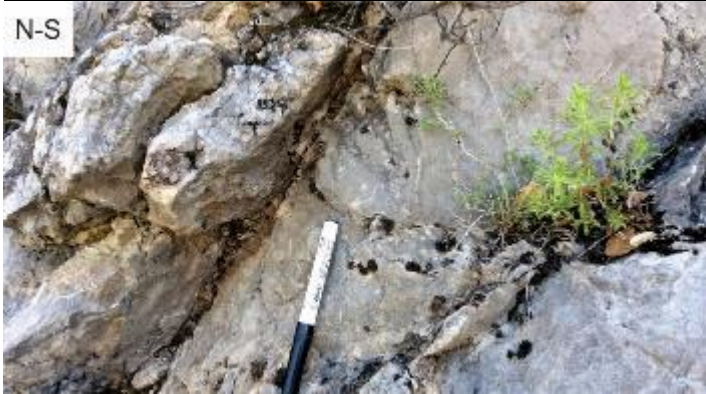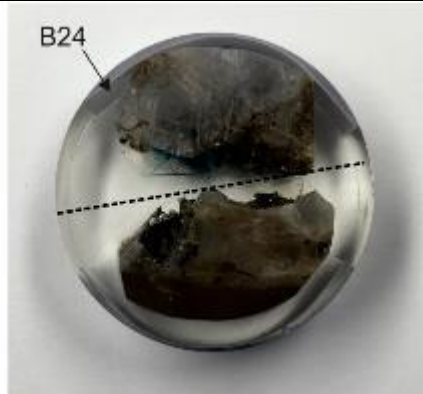

| Sample | Location                      | Description      | Host rock                  | Age |
|--------|-------------------------------|------------------|----------------------------|-----|
| B32    | 42°15'34.75"N<br>1°51'59.95"E | N-S calcite vein | Lower Eocene<br>limestones | Yes |

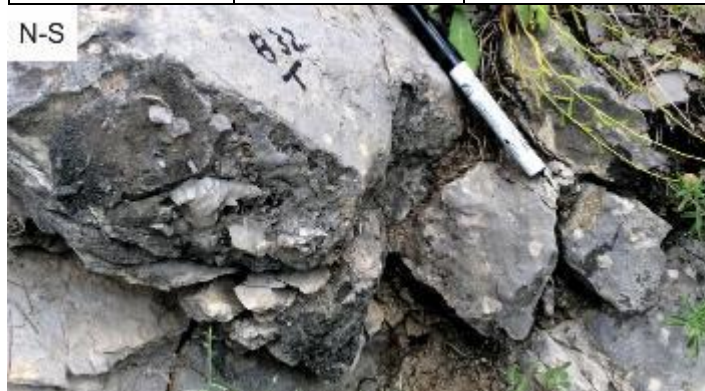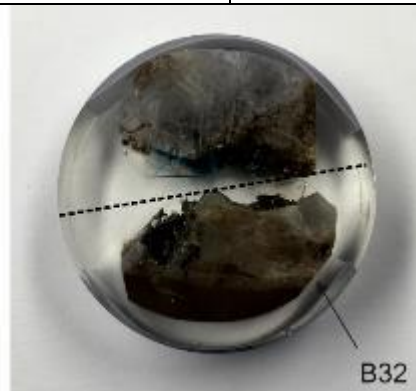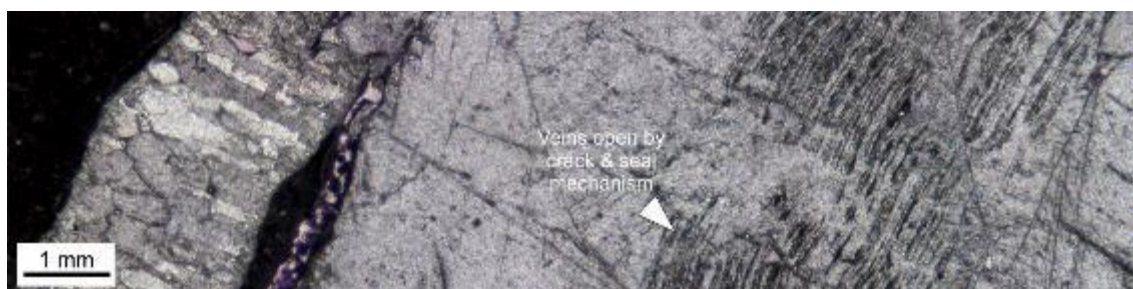

Sample B2: Optical microscope image showing elongated sparite perpendicular to fracture walls and veinlets formed by crack & seal mechanism.

| Sample | Location                    | Description                         | Host rock                  | Age |
|--------|-----------------------------|-------------------------------------|----------------------------|-----|
| B45    | 42°16'3.65"N<br>1°51'5.22"E | Calcite within<br>strike-slip fault | Lower Eocene<br>limestones | No  |

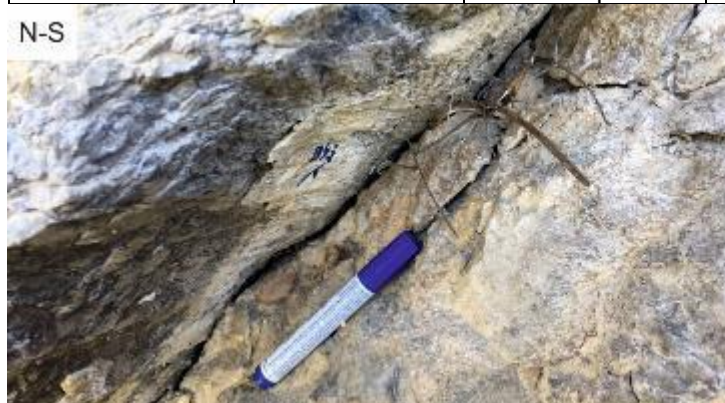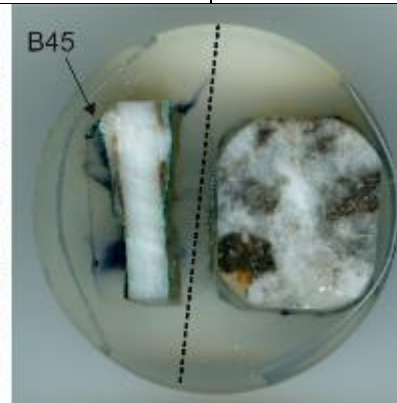

| Sample | Location                     | Description      | Host rock                  | Age |
|--------|------------------------------|------------------|----------------------------|-----|
| B46    | 42°15'55.18"N<br>1°51'1.34"E | N-S calcite vein | Lower Eocene<br>limestones | Yes |

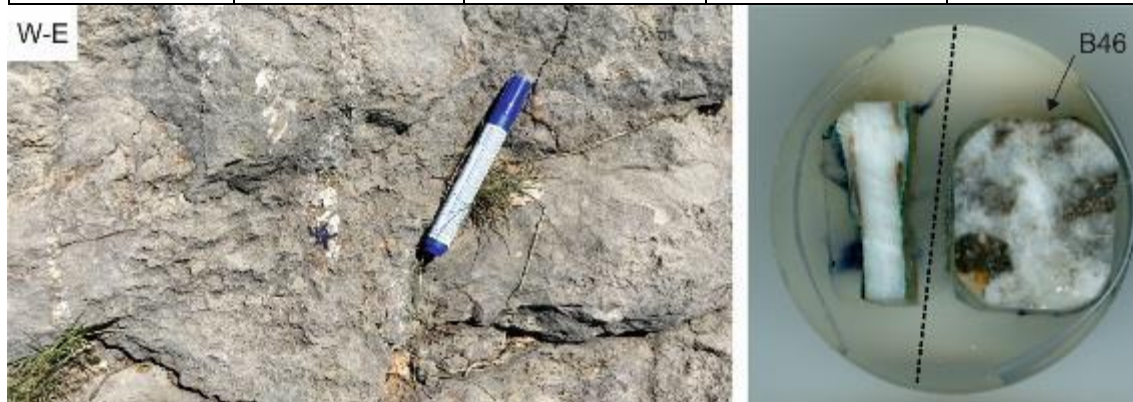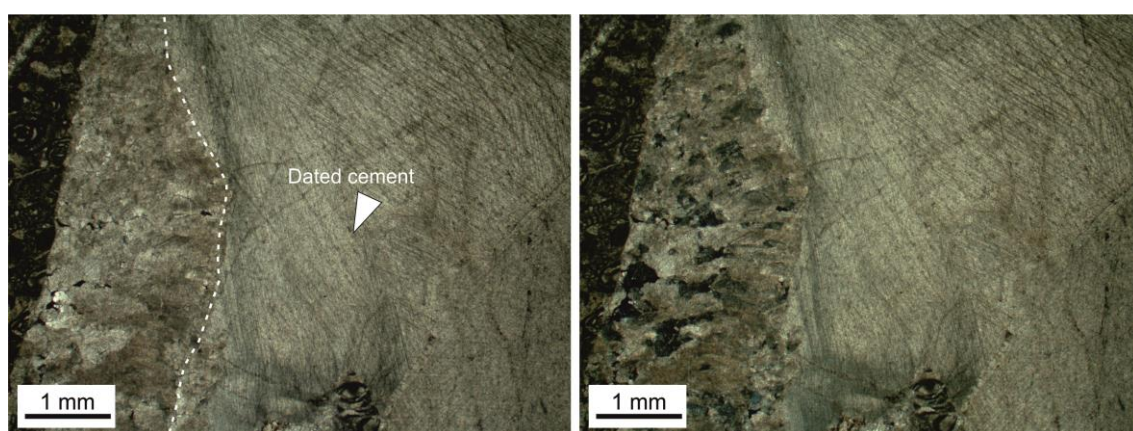

Sample B46: Optical microscope images of blocky texture of the analyzed calcite cement.

| Sample | Location                      | Description                     | Host rock               | Age |
|--------|-------------------------------|---------------------------------|-------------------------|-----|
| GDV13  | 42° 7'47.45"N<br>1°53'59.15"E | Calcite within<br>reverse fault | Oligocene<br>sandstones | No  |

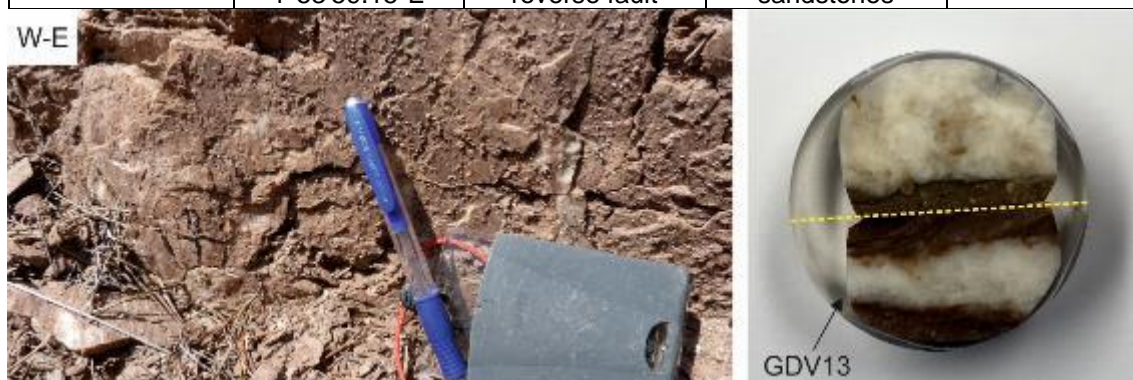

| Sample | Location                     | Description      | Host rock                  | Age |
|--------|------------------------------|------------------|----------------------------|-----|
| B54    | 42°15'52.14"N<br>1°51'4.54"E | N-S calcite vein | Lower Eocene<br>limestones | Yes |

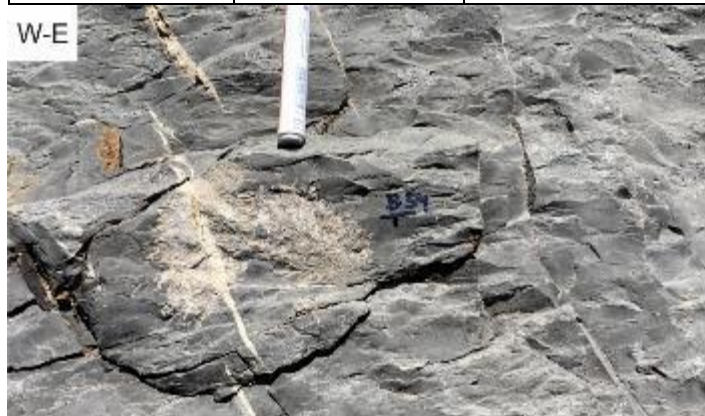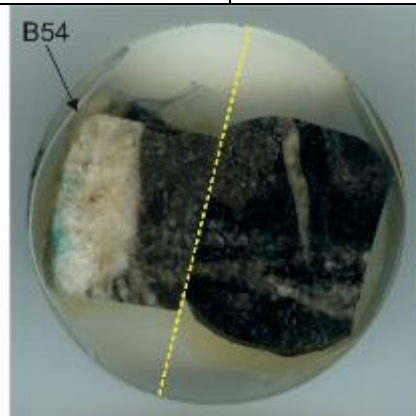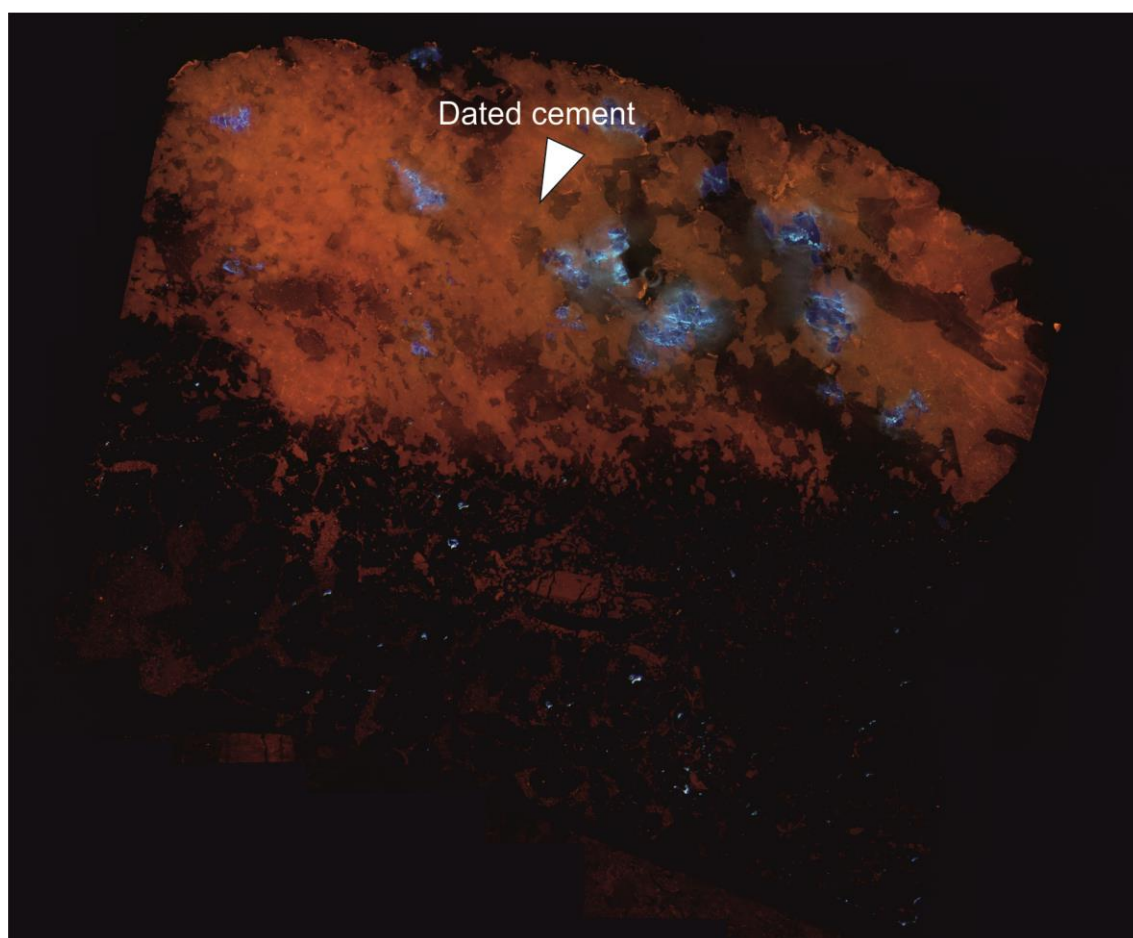

Sample B54: Cathodoluminescence microscope image of the analyzed mound showing the blocky texture of the aged calcite cement.

| Sample | Location                    | Description                     | Host rock             | Age |
|--------|-----------------------------|---------------------------------|-----------------------|-----|
| GDV5   | 42°7'49.04"N<br>1°54'1.88"E | Calcite within<br>reverse fault | Lower Eocene<br>marls | Yes |

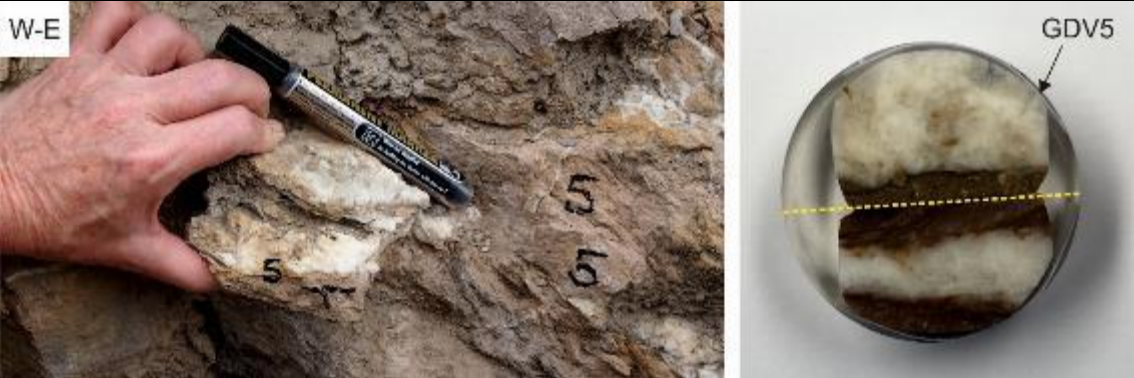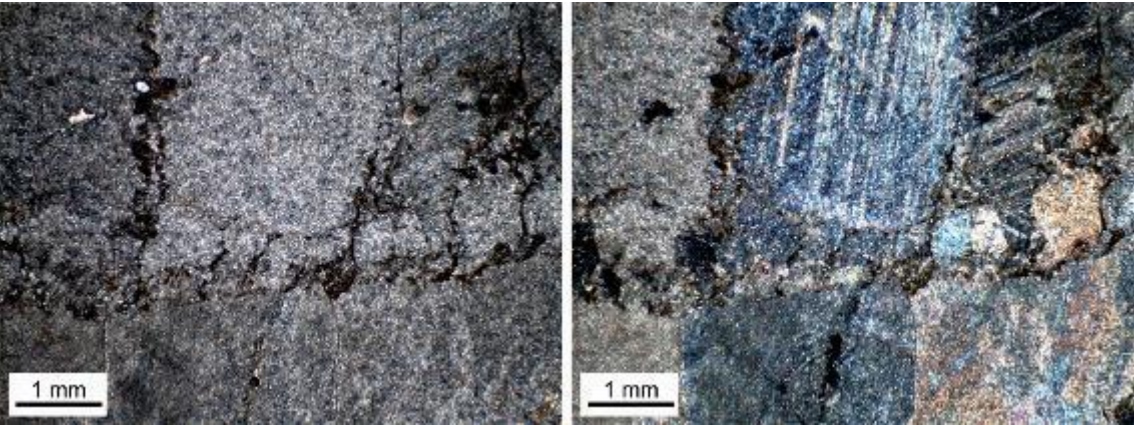

Sample GDV5: Optical microscope images of blocky texture of the analyzed calcite cement.

| Sample | Location                     | Description                         | Host rock             | Age |
|--------|------------------------------|-------------------------------------|-----------------------|-----|
| GDV26  | 42° 7'49.33"N<br>1°54'2.79"E | Calcite within<br>strike-slip fault | Lower Eocene<br>marls | No  |

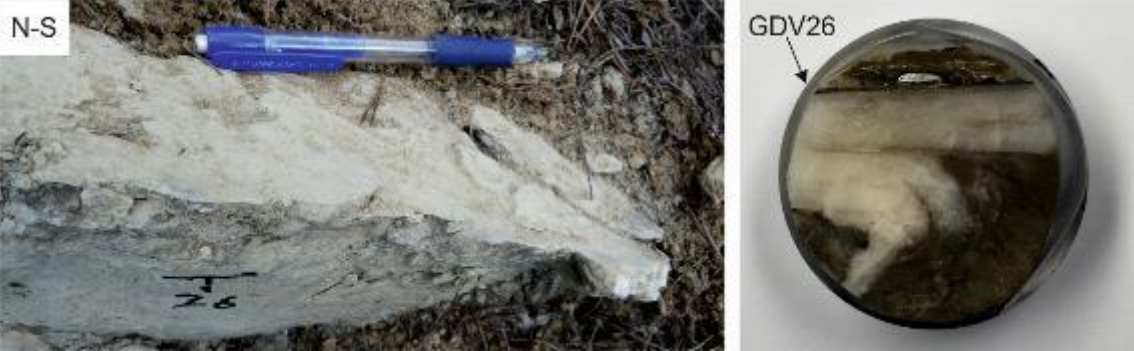

| Sample | Location                      | Description                  | Host rock                  | Age |
|--------|-------------------------------|------------------------------|----------------------------|-----|
| B57    | 42°15'43.95"N<br>1°52'24.76"E | N-S and E-W<br>calcite veins | Lower Eocene<br>limestones | Yes |

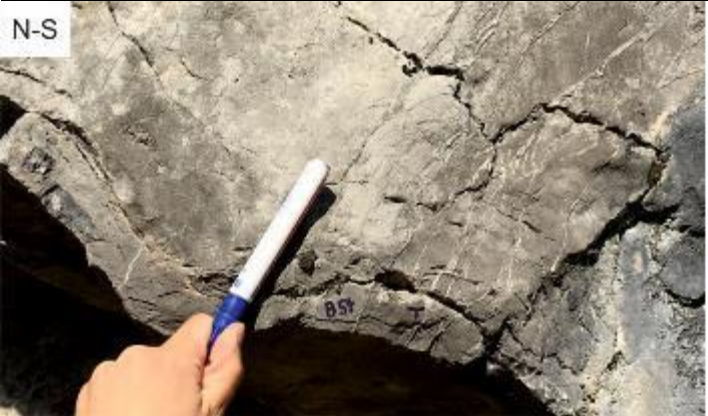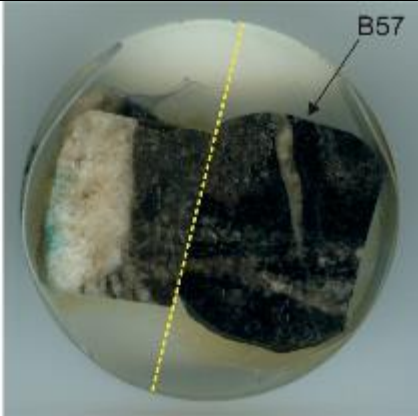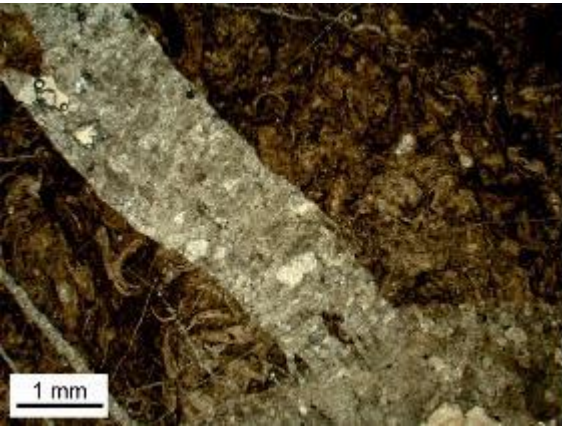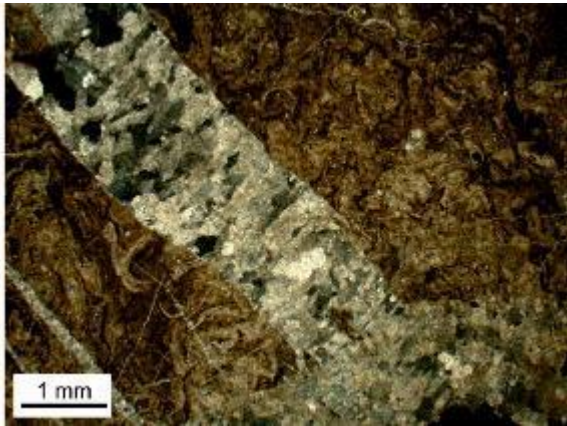

Sample B57: Optical microscope image showing elongated sparite perpendicular to fracture walls.

| Sample | Location                      | Description      | Host rock             | Age          |
|--------|-------------------------------|------------------|-----------------------|--------------|
| GIS1   | 42°15'58.35"N<br>1°44'33.28"E | E-W calcite vein | Lower Eocene<br>marls | Not analyzed |

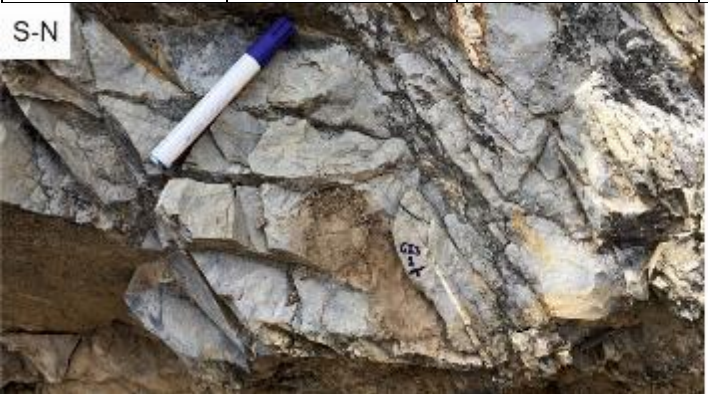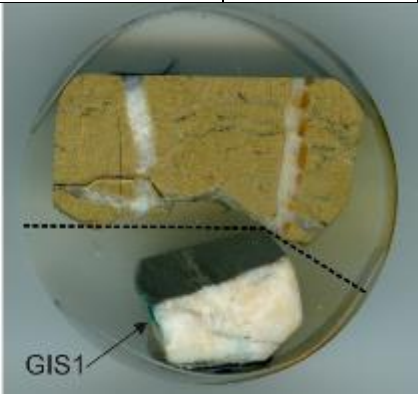

| Sample | Location                      | Description      | Host rock             | Age |
|--------|-------------------------------|------------------|-----------------------|-----|
| GIS4   | 42°16'10.42"N<br>1°42'29.96"E | N-S calcite vein | Lower Eocene<br>marls | Yes |

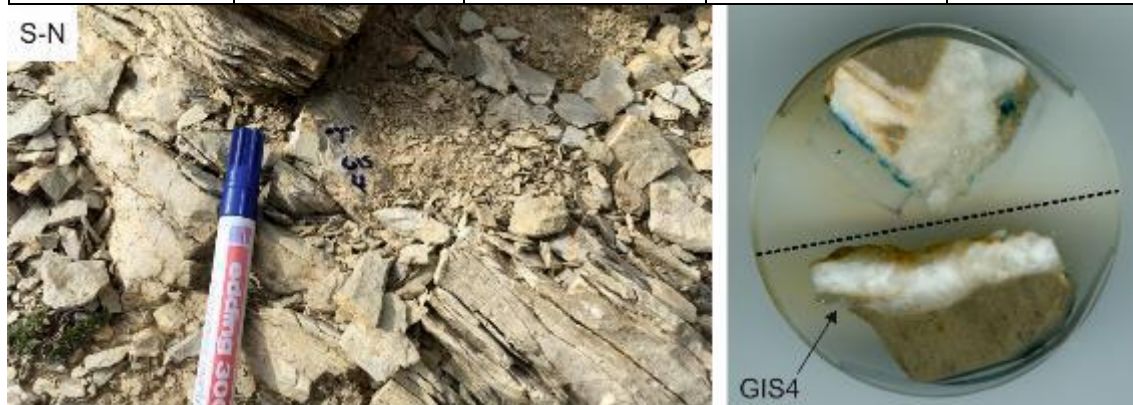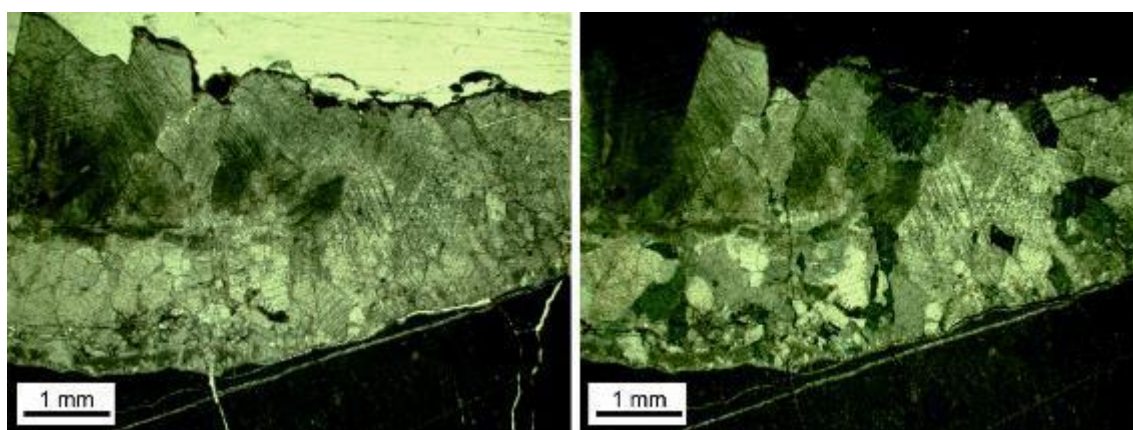

Sample GIS4: Optical microscope images of blocky texture of the analyzed calcite cement.

| Sample | Location                      | Description                  | Host rock                         | Age |
|--------|-------------------------------|------------------------------|-----------------------------------|-----|
| PA9    | 42°17'53.69"N<br>1°42'49.66"E | N-S and E-W<br>calcite veins | Upper<br>Cretaceous<br>limestones | No  |

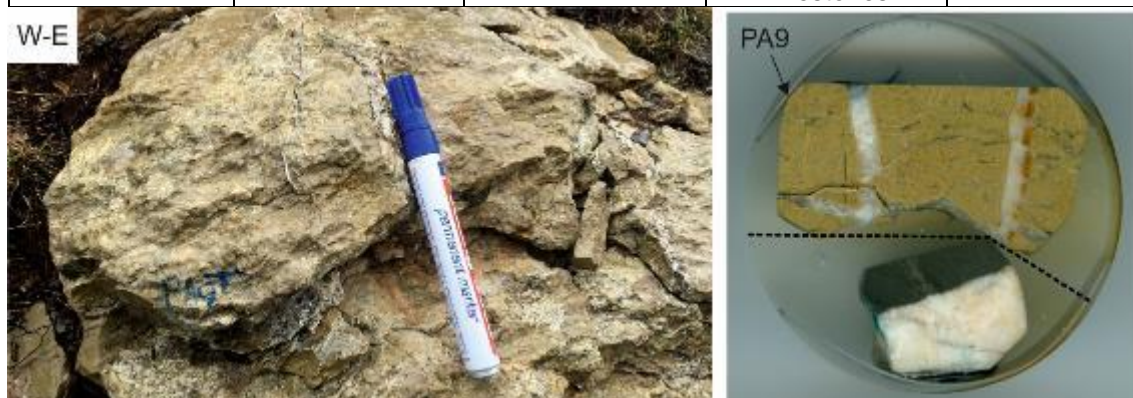

| Sample | Location                      | Description                  | Host rock             | Age |
|--------|-------------------------------|------------------------------|-----------------------|-----|
| GIS10A | 42°15'56.29"N<br>1°41'36.05"E | N-S and E-W<br>calcite veins | Lower Eocene<br>marls | Yes |

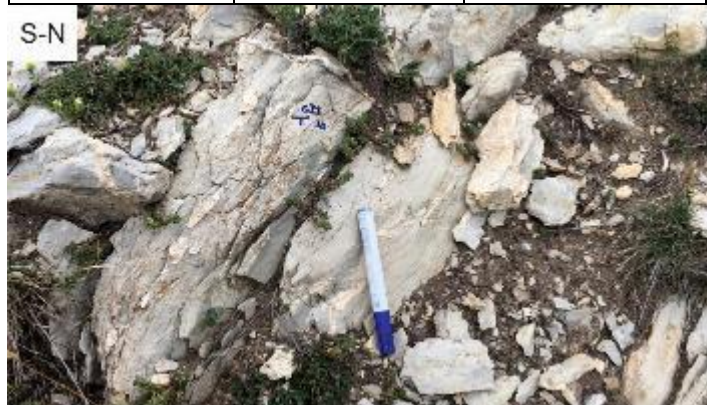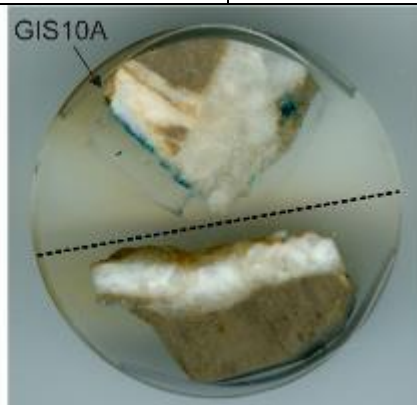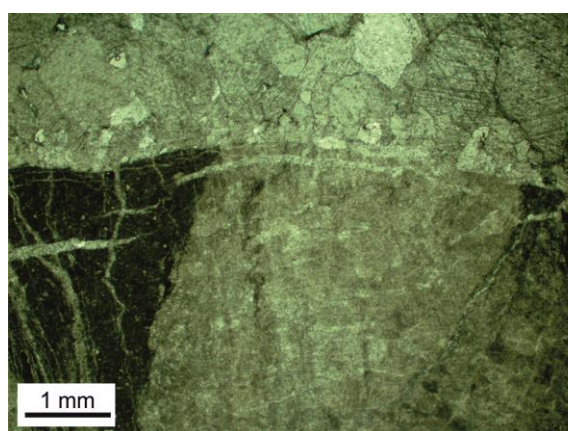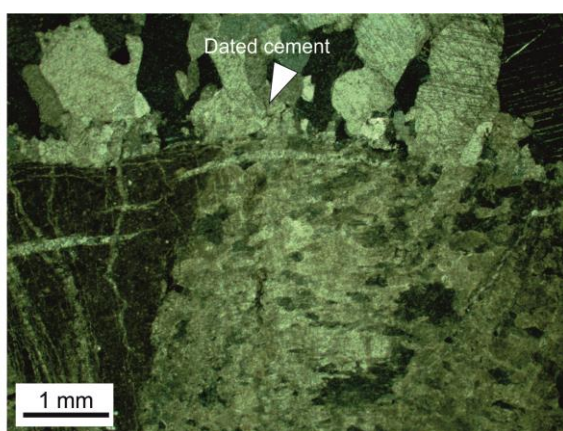

Sample GIS10A: Optical microscope images of blocky texture of the analyzed calcite cement.

| Sample | Location                      | Description                     | Host rock                         | Age |
|--------|-------------------------------|---------------------------------|-----------------------------------|-----|
| PA12   | 42°17'53.97"N<br>1°42'57.09"E | Calcite within<br>reverse fault | Upper<br>Cretaceous<br>limestones | Yes |

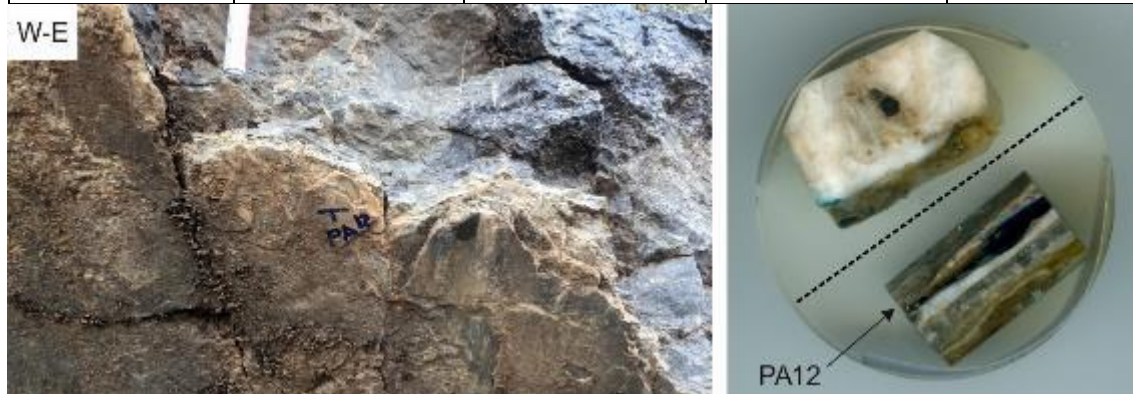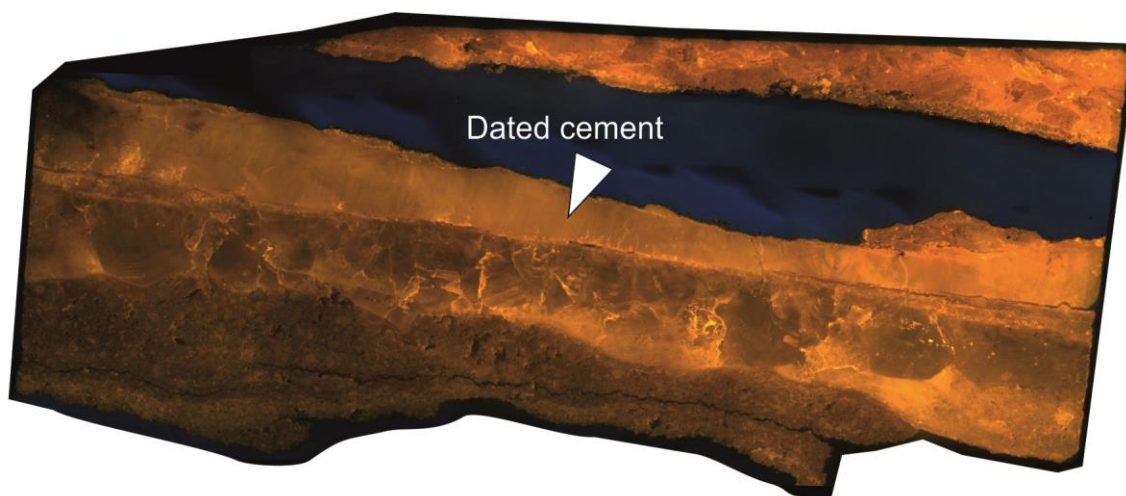

Sample PA12: Cathodoluminescence microscope image of the analyzed mound showing the blocky texture of the aged calcite cement.

**Ebro Basin**

| Sample | Location                     | Description                         | Host rock               | Age |
|--------|------------------------------|-------------------------------------|-------------------------|-----|
| 309B   | 42° 4'8.05"N<br>1°34'14.09"E | Calcite within<br>strike-slip fault | Oligocene<br>sandstones | No  |

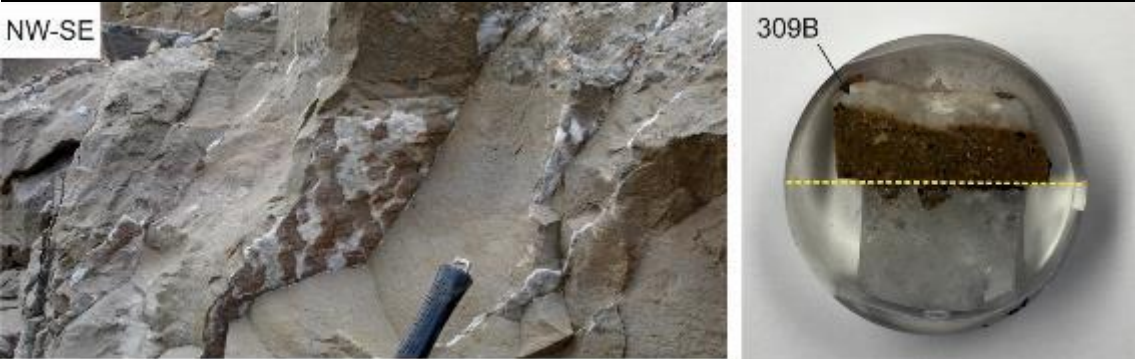

| Sample | Location                     | Description                         | Host rock               | Age |
|--------|------------------------------|-------------------------------------|-------------------------|-----|
| 311A   | 42° 3'54.91"N<br>1°34'9.26"E | Calcite within<br>strike-slip fault | Oligocene<br>sandstones | No  |

| Sample | Location                     | Description                     | Host rock               | Age |
|--------|------------------------------|---------------------------------|-------------------------|-----|
| GPR401 | 42° 3'54.91"N<br>1°34'9.26"E | Calcite within<br>fault breccia | Oligocene<br>sandstones | Yes |

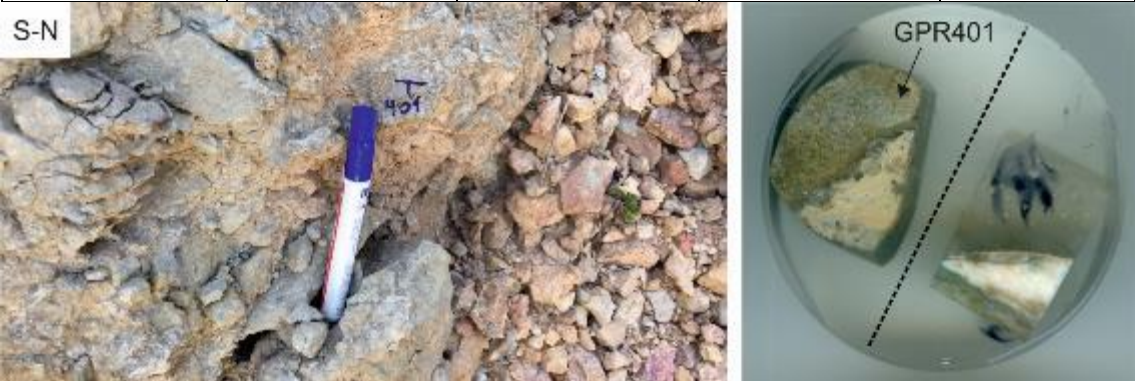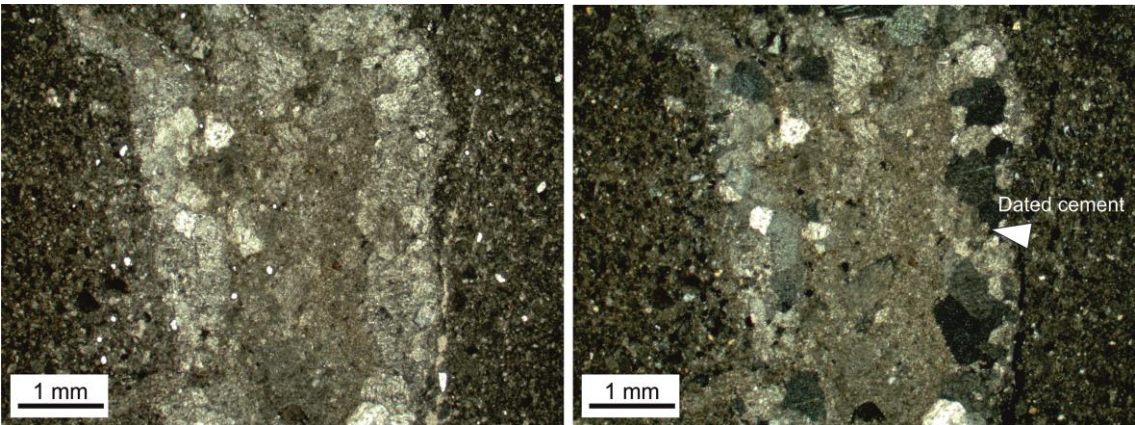

Sample GPR401: Optical microscope images of blocky texture of the analyzed calcite cement.

**Axial Zone**

| Sample | Location                      | Description                     | Host rock              | Age |
|--------|-------------------------------|---------------------------------|------------------------|-----|
| C8     | 42°20'12.45"N<br>1°29'57.58"E | Calcite within<br>reverse fault | Devonian<br>limestones | No  |

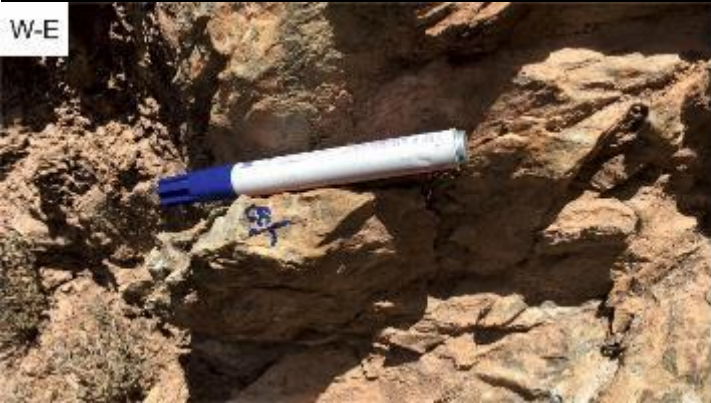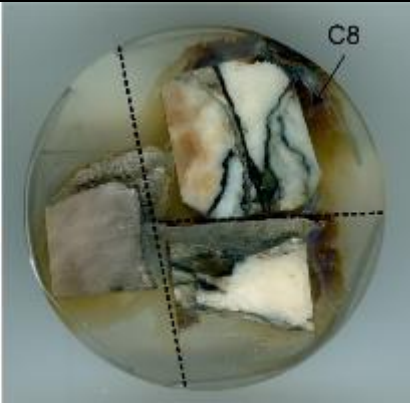

| Sample | Location                      | Description                     | Host rock              | Age |
|--------|-------------------------------|---------------------------------|------------------------|-----|
| C9     | 42°20'12.45"N<br>1°29'57.58"E | Calcite within<br>reverse fault | Devonian<br>limestones | No  |

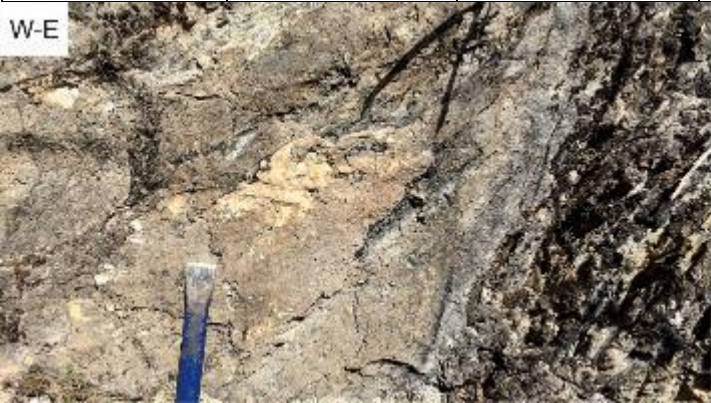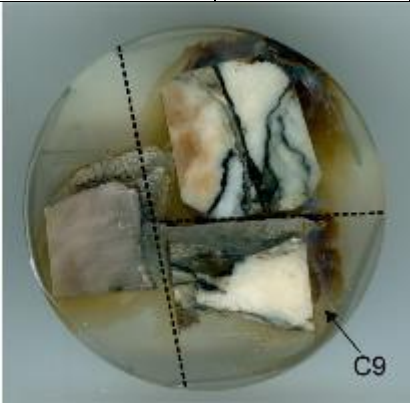

| Sample | Location                      | Description      | Host rock                 | Age |
|--------|-------------------------------|------------------|---------------------------|-----|
| C10    | 42°20'12.45"N<br>1°29'57.58"E | N-S calcite vein | Permian volcanic<br>rocks | No  |

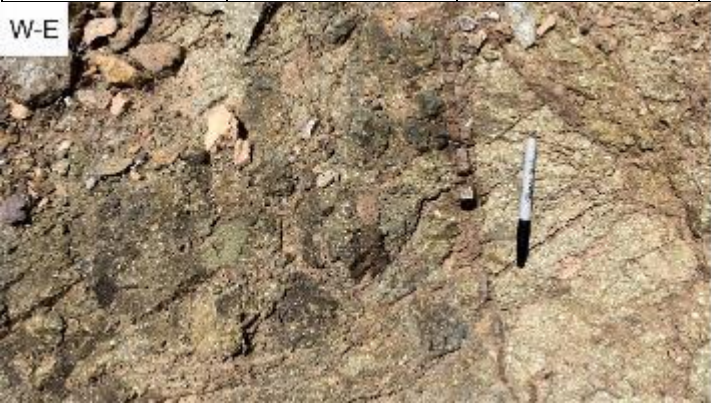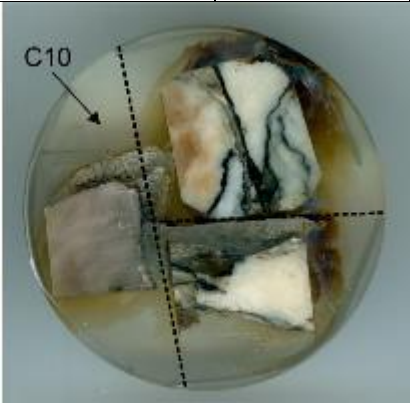

| Sample | Location                      | Description      | Host rock              | Age |
|--------|-------------------------------|------------------|------------------------|-----|
| C12    | 42°20'12.45"N<br>1°29'57.58"E | E-W calcite vein | Permian volcanic rocks | Yes |

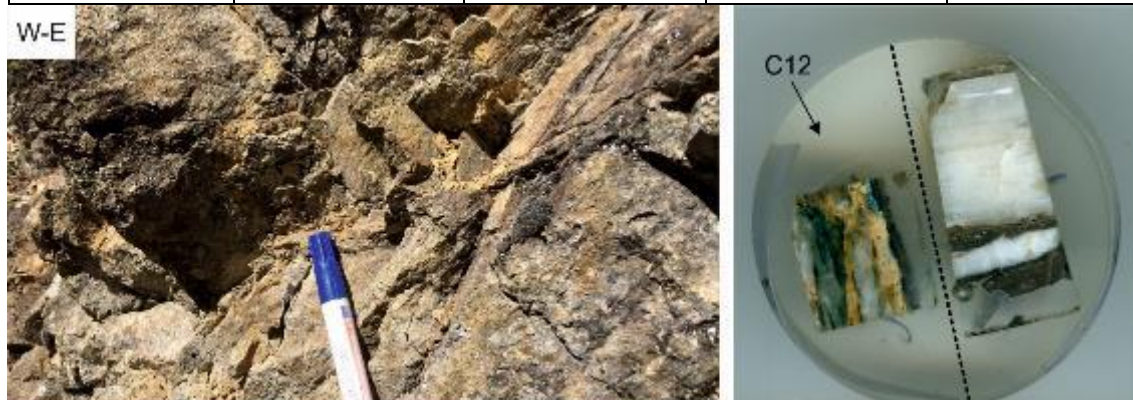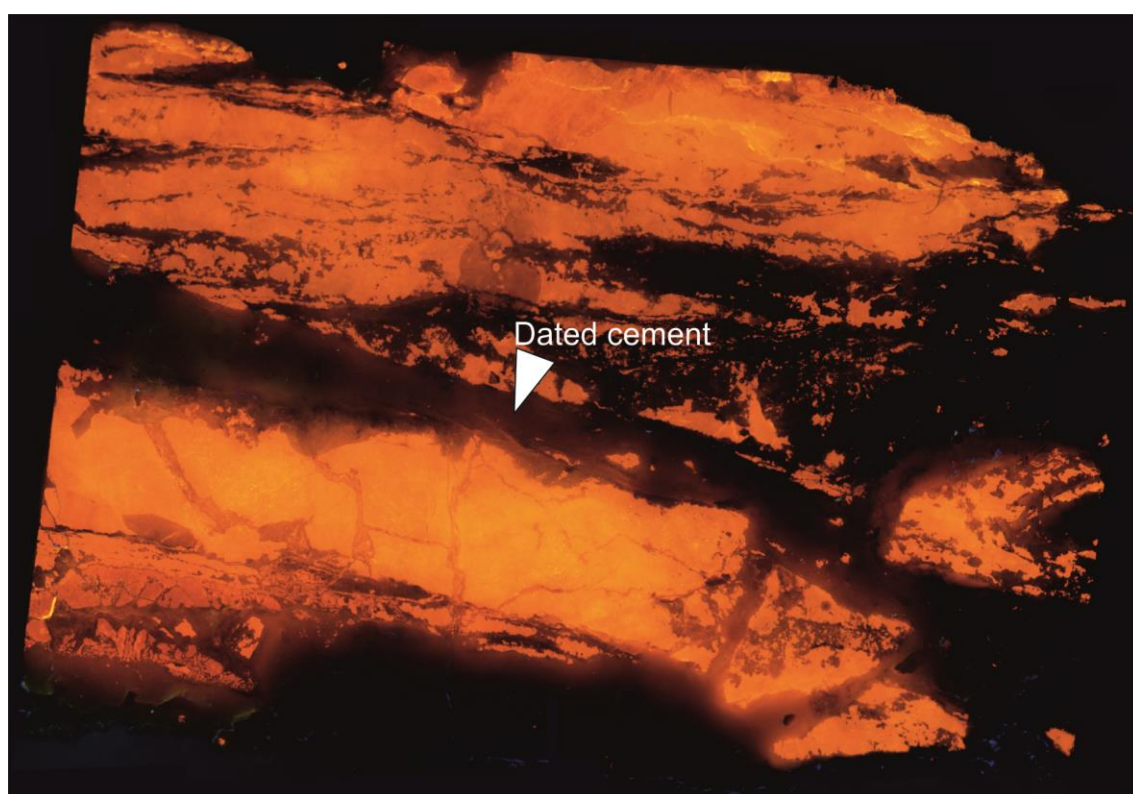

Sample C12: Cathodoluminescence microscope image of the analyzed mound showing the blocky texture of the aged calcite cement.

| Sample | Location                     | Description                     | Host rock                    | Age |
|--------|------------------------------|---------------------------------|------------------------------|-----|
| Est-2  | 42°21'37.16"N<br>1°31'5.31"E | Calcite within<br>reverse fault | Permian? ?<br>volcanic rocks | No  |

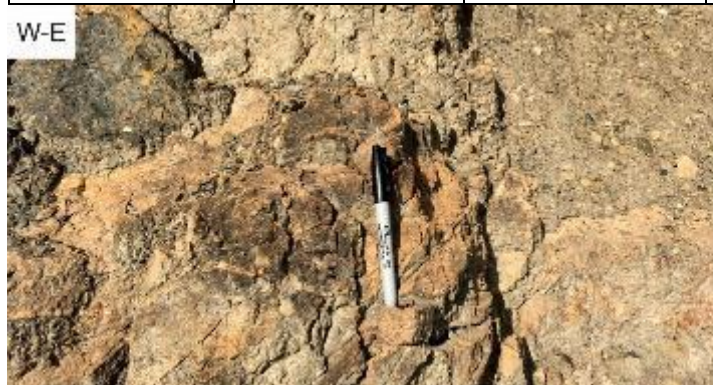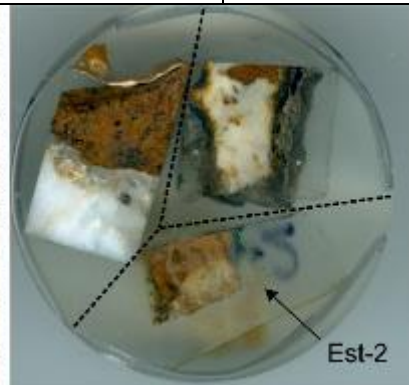

| Sample | Location                     | Description                     | Host rock              | Age |
|--------|------------------------------|---------------------------------|------------------------|-----|
| Est-8  | 42°21'34.91"N<br>1°31'8.19"E | Calcite within<br>reverse fault | Devonian<br>limestones | No  |

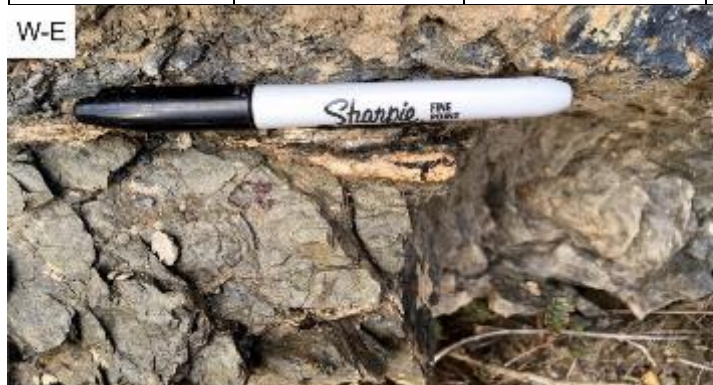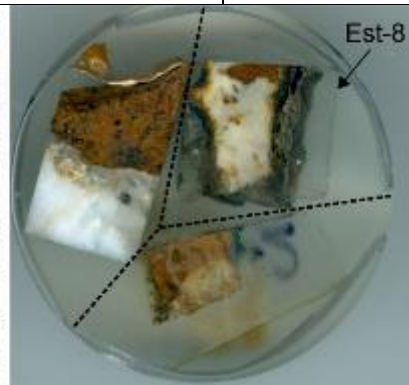

| Sample | Location                      | Description                     | Host rock              | Age |
|--------|-------------------------------|---------------------------------|------------------------|-----|
| MAI2   | 42°32'43.83"N<br>1°43'11.37"E | Calcite within<br>reverse fault | Devonian<br>limestones | No  |

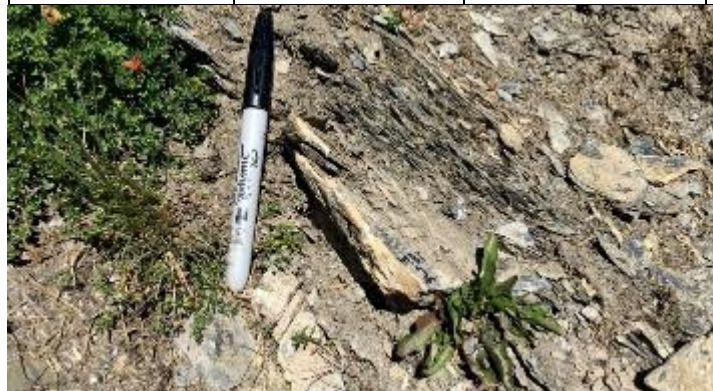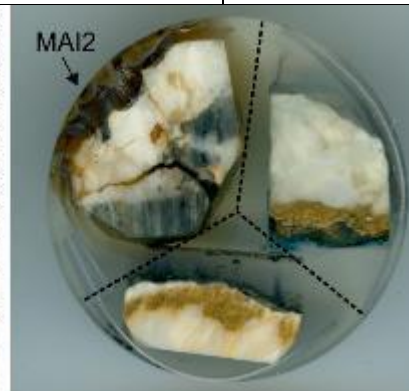

| Sample | Location                      | Description                     | Host rock              | Age |
|--------|-------------------------------|---------------------------------|------------------------|-----|
| MAI3   | 42°32'43.91"N<br>1°43'11.58"E | Calcite within<br>reverse fault | Devonian<br>limestones | No  |

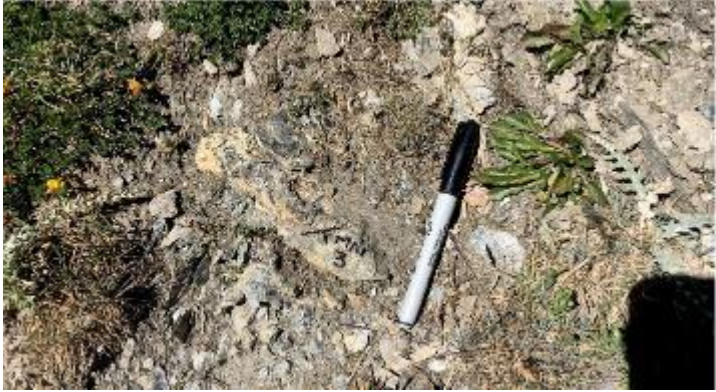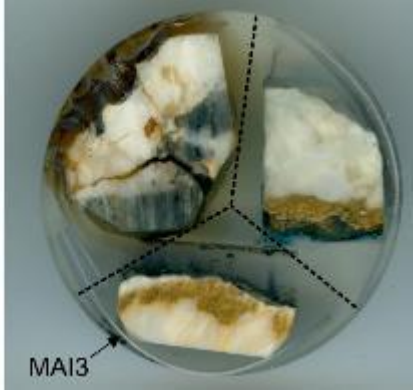

| Sample | Location                      | Description                     | Host rock              | Age |
|--------|-------------------------------|---------------------------------|------------------------|-----|
| MAI4   | 42°32'43.69"N<br>1°43'11.01"E | Calcite within<br>reverse fault | Devonian<br>limestones | No  |

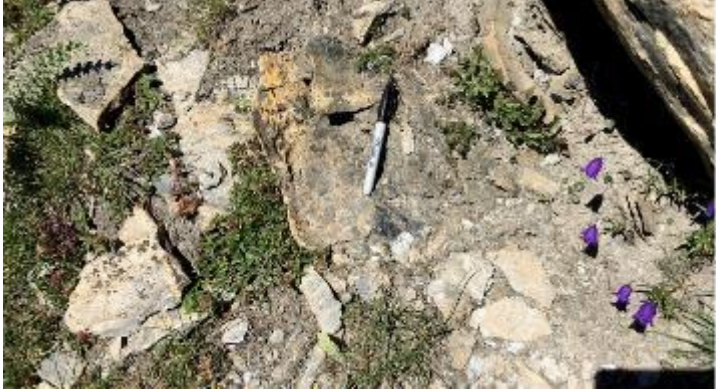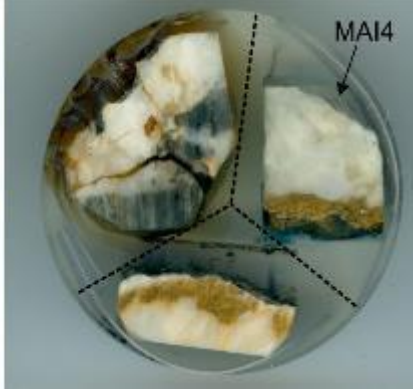

Supplement: Supplementary file 1 [file 24117888]
